1 **Eudicot primary cell wall glucomannan is related in synthesis,**  
2 **structure and function to xyloglucan<sup>i</sup>**

3 Li Yu<sup>1</sup>, Yoshihisa Yoshimi<sup>1</sup>, Rosalie Cresswell<sup>2</sup>, Raymond Wightman<sup>3</sup>, Jan J.  
4 Lyczakowski<sup>1a</sup>, Louis F.L. Wilson<sup>1b</sup>, Konan Ishida<sup>1</sup>, Katherine Stott<sup>4</sup>, Xiaolan Yu<sup>1</sup>,  
5 Stephan Charalambous<sup>1</sup>, Joel Wurman-Rodrich<sup>1c</sup>, Ray Dupree<sup>2</sup>, Oliver M. Terrett<sup>1</sup>,  
6 Steven P. Brown<sup>2</sup>, Henry Temple<sup>1</sup>, Kristian B.R.M. Krogh<sup>5</sup>, Paul Dupree<sup>1\*</sup>

7 <sup>1</sup> Department of Biochemistry, University of Cambridge, Hopkins Building, The  
8 Downing Site, Tennis Court Road, Cambridge CB2 1QW, UK

9 <sup>2</sup> Physics Department, University of Warwick, Coventry CV4 7AL, UK

10 <sup>3</sup> Microscopy Core Facility, Sainsbury Laboratory, University of Cambridge, Bateman  
11 Street, Cambridge CB2 1LR, UK

12 <sup>4</sup> Department of Biochemistry, University of Cambridge, Sanger Building, 80 Tennis  
13 Court Road, Cambridge CB2 1GA, UK

14 <sup>5</sup> Novozymes A/S, Krogshøjvej 36, 2880 Bagsværd, Denmark

15 <sup>a</sup> Current Address: Department of Plant Biotechnology, Faculty of Biochemistry,  
16 Biophysics and Biotechnology, Jagiellonian University, Krakow, Poland

17 <sup>b</sup> Current Address: Department of Molecular Physiology and Biophysics, University  
18 of Virginia, Charlottesville, Virginia 22903, USA

19 <sup>c</sup> Current Address: LabGenius, 100 Drummond road, Cocoa Studios, The Biscuit  
20 Factory, London SE16 4DG, UK

21

22 \*Corresponding author: Paul Dupree Email: [pd101@cam.ac.uk](mailto:pd101@cam.ac.uk)

23

24 **Short Title:** A glucomannan related to xyloglucan.

25 **One sentence summary: Patterned  $\beta$ -GGM resembles xyloglucan in structure,**  
26 **biosynthesis and function.**

---

<sup>i</sup> The author responsible for distribution of materials integral to the findings presented in this article in accordance with the policy described in the Instructions for Authors (<https://academic.oup.com/plcell/pages/General-Instructions>) is: Paul Dupree (pd101@cam.ac.uk).

27

## 28 **Abstract**

29 The functional differences between plant cell wall hemicelluloses such as  
30 glucomannan, xylan and xyloglucan (XyG) remain unclear. These polysaccharides  
31 influence assembly and properties of the wall, perhaps by interacting with cellulose  
32 to affect the deposition and bundling of the fibrils. As the most abundant  
33 hemicellulose, XyG is considered important in eudicot primary cell walls (PCWs), but  
34 plants devoid of XyG show relatively mild phenotypes. We report here that a  
35 patterned  $\beta$ -galactoglucomannan ( $\beta$ -GGM) is widespread in PCW of eudicots and  
36 shows remarkable similarities to XyG. The sugar linkages forming the backbone and  
37 side chains of  $\beta$ -GGM are analogous to those that make up XyG, and moreover,  
38 these linkages are formed by glycosyltransferases from the same CAZy families.  
39 Solid-state NMR indicated that  $\beta$ -GGM shows low mobility in the cell wall, consistent  
40 with interaction with cellulose. Although Arabidopsis  $\beta$ -GGM synthesis mutants show  
41 no obvious growth defects, genetic crosses between  $\beta$ -GGM and XyG mutants  
42 produce exacerbated phenotypes compared to XyG mutants. These findings  
43 demonstrate a related role of these two similar but distinct classes of hemicelluloses  
44 in PCWs. This work will provide new avenues to study the roles of both  $\beta$ -GGM and  
45 XyG in PCWs.

## 46 **Introduction**

47 Although the primary cell wall (PCW) is strong enough to protect the plant cell from  
48 osmotic lysis and to maintain cell and tissue shape, it can also allow the cell to  
49 expand irreversibly during growth. How the cell wall accommodates both these  
50 contrasting and fundamental properties is poorly understood. The PCW is a  
51 composite of relatively rigid cellulose microfibrils embedded in a highly hydrated  
52 matrix of non-cellulosic polysaccharides. The hemicellulose polysaccharides  
53 xyloglucan (XyG), xylan and glucomannan are able to bind tightly to cellulose  
54 (Cavalier et al., 2008; Cosgrove, 2014; Simmons et al., 2016; Terrett et al., 2019).  
55 For many years a cellulose-XyG network was proposed to be the principal load-  
56 bearing structure of the PCW in dicots (Cosgrove, 2018). However, experimental  
57 data is now more consistent with a view where cellulose fibril interactions largely  
58 determine wall extensibility (Zhang et al., 2021). Hemicelluloses such as XyG may  
59 influence cell wall extensibility through binding at potential localised sites of cellulose

60 fibril interaction (hot spots) (Park and Cosgrove, 2015). How the different  
61 hemicelluloses contribute to plant cell wall assembly remains an important challenge  
62 in cell wall biology.

63 XyG is the best studied PCW hemicellulose with a repeating patterned structure. In  
64 most dicots, this unit is normally comprised of four  $\beta$ -1,4-linked glucosyl residues  
65 (Glc), with the first three backbone residues in each unit substituted with  $\alpha$ -1,6-  
66 xylosyl (Xyl) branches. This unit can be conveniently described as 'XXXG'  
67 (Supplemental Figure S1) using the established nomenclature (Fry et al., 1993). Xyl  
68 residues at positions two or three can be further decorated with  $\beta$ -1,2-galactose (e.g.  
69 XXLG), galacturonic acid or a variety of other sugars (Pauly and Keegstra, 2016),  
70 some of which may be further decorated with  $\alpha$ -1,2-fucose. The XyG side chains  
71 probably influence the solubility of the polysaccharide during synthesis and  
72 secretion, as well as in the cell wall (Whitney et al., 2006; Han et al., 2020). The  
73 importance of the repeating structure of XyG is unclear, but it may influence how  
74 XyG adheres to surfaces of cellulose, impacting PCW properties (Zhao et al., 2014;  
75 Park and Cosgrove, 2015; Benselfelt et al., 2016). Indeed, the regular pattern of  
76 substitution of xylan, an unrelated hemicellulose, is thought to influence the binding  
77 of xylan to cellulose in secondary cell walls (Simmons et al., 2016; Grantham et al.,  
78 2017). The complete loss of XyG in the *xxt1 xxt2* Arabidopsis xylosyltransferase  
79 mutant affects the production and arrangement of cellulose in PCW in hypocotyls  
80 (Xiao et al., 2016; Zhao et al., 2019). However, this XyG mutant, and also the XyG-  
81 deficient quintuple *cs/c* backbone synthesis mutant, have just small perturbations in  
82 growth (Cavalier et al., 2008; Kim et al., 2020), raising questions about the  
83 importance of this hemicellulose in PCW. In contrast, the loss of MUR3-dependant  $\beta$ -  
84 1,2-galactosylation results in a 'cabbage-like' rosette and dwarfed growth (Tamura et  
85 al., 2005; Tedman-Jones et al., 2008). This reveals a specific and important role of  
86 the XyG disaccharide side chain (and its fucosylated derivative), which may maintain  
87 XyG solubility during secretion or assembly of the wall (Aryal et al., 2020; Velasquez  
88 et al., 2021).

89 In the glucomannan of secondary cell walls (SCWs), the backbone of  $\beta$ -1,4-linked  
90 mannosyl (Man) residues is randomly interspersed with  $\beta$ -1,4-Glc residues and  
91 sometimes bears occasional  $\alpha$ -1,6-linked galactose (Gal) branches. The Man  
92 residues are often acetylated (we refer here to this hemicellulose as acetylated

93 galactoglucomannan, AcGGM) (Goubet et al., 2009; Scheller and Ulvskov, 2010;  
94 Rodri'guez-Gacio et al., 2012). Such glucomannans are particularly abundant in  
95 gymnosperm SCW, where they interact with cellulose (Terrett et al., 2019; Cresswell  
96 et al., 2021). However, in contrast to the random backbone of the AcGGM polymer, a  
97 glucomannan from Arabidopsis seed mucilage has recently been found to exhibit a  
98 repeating backbone of the disaccharide [4-Glc- $\beta$ -1,4-Man- $\beta$ -1,], with frequent  $\alpha$ -1,6-  
99 Gal branches on the Man residues (Voiniciuc et al., 2015; Yu et al., 2018). A  
100 glucomannan with elements of this repeating backbone has been reported from  
101 kiwifruit and tobacco cell cultures (Sims et al., 1997; Schröder et al., 2001), but the  
102 structure of PCW glucomannan is, in general, not well characterised.

103 Evidence for the importance of glucomannan in the PCW has been obtained from  
104 mannan biosynthesis mutants. The  $\alpha$ -1,6-Gal substitutions on the glucomannan of  
105 Arabidopsis mucilage are added by Mannan Alpha Galactosyl Transferase 1  
106 (MAGT1)/MUCILAGE-RELATED10 (MUC110) in CAZy family GT34 (Voiniciuc et al.,  
107 2015; Yu et al., 2018). Mutants in this glucomannan galactosylation show defective  
108 mucilage architecture and cellulose rays. CSLA enzymes from CAZy family GT2  
109 synthesise the glucomannan backbone (Liepman et al., 2005; Liepman et al., 2007).  
110 The mucilage glucomannan backbone is made by CSLA2, and *cs/a2* mutants also  
111 show defective mucilage architecture (Yu et al., 2014). Arabidopsis mutants in  
112 CSLA9, which is largely responsible for SCW glucomannan synthesis, show no  
113 obvious changes in wall properties (Goubet et al., 2009). However, the embryo  
114 lethality of the Arabidopsis *cs/a7* mutant suggests an important role of glucomannan,  
115 at least in embryonic PCWs (Goubet et al., 2003). Recently glucomannan has also  
116 been implicated in etiolated hypocotyl gravitropic bending, which involves  
117 asymmetric cell expansion (Somssich et al., 2021). Despite these examples that  
118 glucomannan is important in some instances, the role for PCW glucomannan in plant  
119 growth and development, and whether that role is related to that of other  
120 hemicelluloses, remains obscure.

121 Here, we investigate the structure, synthesis and function of PCW glucomannan. We  
122 report that a novel type of mannan is widely present in eudicot PCWs, and we name  
123 it  $\beta$ -GalactoGlucoMannan ( $\beta$ -GGM). The  $\beta$ -GGM has a repeating backbone structure  
124 with evenly spaced  $\alpha$ -Gal substitutions, some of which are further substituted with  $\beta$ -  
125 1,2-Gal. We identify the biosynthetic machinery required to synthesise the backbone

126 and sidechains.  $\beta$ -GGM has not only many structural and biosynthetic similarities  
127 with XyG, but it may also share some functions with XyG in the PCW. These results  
128 demonstrate that distinct hemicelluloses can have associated functions and that a  
129 patterned PCW hemicellulose in addition to XyG may have importance for cell  
130 expansion and plant development.

131

## 132 **Results**

### 133 **Two glucomannan types with distinct structures, synthesised by CSLA2 and** 134 **CSLA9, are widely present in Arabidopsis PCW-rich tissues**

135 We recently found that Arabidopsis mucilage galactoglucomannan has a structure  
136 distinct from SCW acetylated glucomannan (AcGGM) (Yu et al., 2018). We therefore  
137 hypothesised that the fine structure of PCW glucomannan might also be distinct from  
138 SCW glucomannan. To investigate this, we digested alkali-extracted cell walls from  
139 etiolated Arabidopsis seedlings (which have relatively little tissue with SCW) with  
140 mannanase CjMan26A, which cleaves galactoglucomannan, yielding products with  
141 an unsubstituted Man residue at the reducing end (Gilbert, 2010; Yu et al., 2018).  
142 Using polysaccharide analysis by carbohydrate electrophoresis (PACE), we  
143 observed several different mannanase products (Figure 1A and Supplemental Figure  
144 S2). To determine the biosynthetic origin of these glucomannan fragments, we also  
145 analysed cell wall material from *cs/a2* and *cs/a9* mutants. Digestion of the *cs/a2*  
146 mutant walls released mainly oligosaccharides with a low degree of polymerization  
147 (DP), whereas the *cs/a9* mutant walls yielded longer oligosaccharides, with four main  
148 oligosaccharides (named S1–S4). In contrast, mannanase digestion of the *cs/a2*  
149 *cs/a9* double mutant walls released almost no detectable oligosaccharides. These  
150 results show that CSLA2 and CSLA9 are together necessary for the synthesis of  
151 most CjMan26A-digestible glucomannan in seedlings, and that each CSLA enzyme  
152 synthesizes glucomannans with distinct structures.

153 To investigate the mannan present in other PCW-rich tissues of Arabidopsis, alkali-  
154 extracted cell walls from young stem, seeds with mucilage removed (naked seeds),  
155 siliques and leaves were also digested with CjMan26A, and the released  
156 oligosaccharides visualised by PACE. The proportion of CSLA2- and CSLA9-  
157 dependent glucomannan oligosaccharides was similar in most of the tissues, and in  
158 each case, virtually no oligosaccharides were released from the *cs/a2 cs/a9* double  
159 mutant (Figure 1, A-E). However, in leaves, the CSLA9-dependent oligosaccharides  
160 were dominant, which suggests that CSLA9-dependent glucomannan can  
161 predominate in PCW in some tissues (Figure 1D). Together, our data indicate that  
162 two distinct glucomannans, with synthesis dependent on CSLA2 or CSLA9, are  
163 widely present in Arabidopsis PCW-rich tissues.

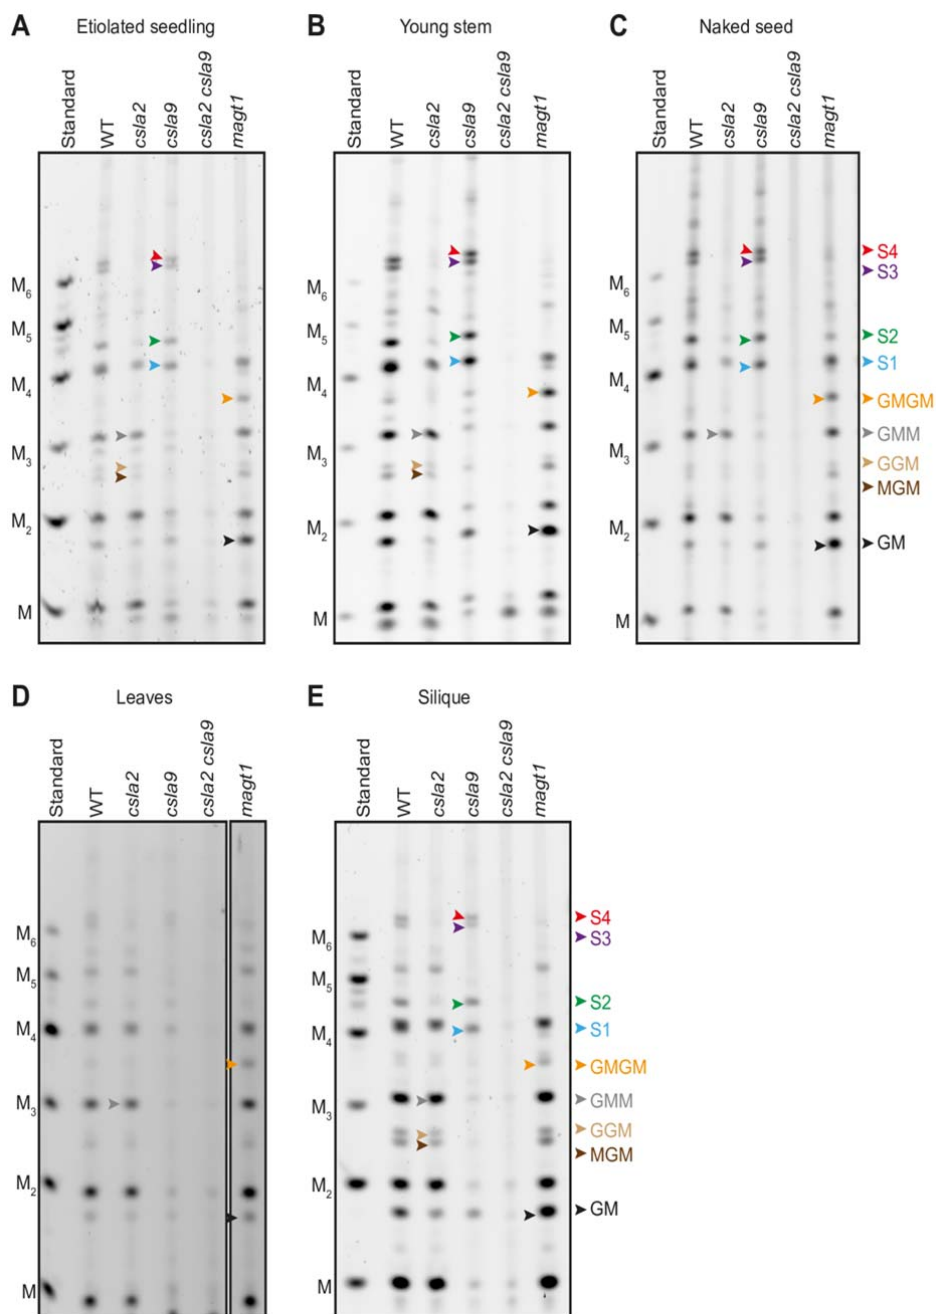

**Figure 1. Two glucomannan types with distinct structures, synthesised by CSLA2 and CSLA9, are widely present in Arabidopsis PCW-rich tissues.** Materials from five tissues, comprising etiolated seedling, young stem, seeds with mucilage removed (naked seed), leaves, and silique, were analysed by PACE. Hemicelluloses were extracted from Col-0, *csla2*, *csla9*, *csla2 csla9*, and *magt1* cell wall material using alkali before being hydrolysed with *endo*-mannanase C<sub>1</sub>Man26A. The products were subsequently derivatised with a fluorophore and separated by gel electrophoresis. The *csla2* mutant yielded oligosaccharides with a low degree of polymerization, whereas the WT and *csla9* mutant walls yielded longer oligosaccharides. The four main oligosaccharides (named S1–S4) are labelled with coloured arrows in samples from *csla9*. In leaves, the amount of S1–S4 was low, and they are missing in *magt1* mutants. M, Man; G, Glc; Manno-oligosaccharide standards M to M<sub>6</sub> are shown.

165 **to xyloglucan**

166 To determine the structures of the distinct glucomannan polysaccharides, we  
167 characterised the oligosaccharides released from the CSLA2- and CSLA9-  
168 dependent glucomannans. We focussed first on the CSLA9-dependent  
169 oligosaccharides from *cs/a2* plants. From their migration in the PACE gel, we  
170 assigned the main *CjMan26A* products as mannose, mannobiose, Glc- $\beta$ -1,4-Man- $\beta$ -  
171 1,4-Man (GMM, using a single letter code for each position), and Man- $\beta$ -1,4-Glc- $\beta$ -  
172 1,4-Man- $\beta$ -1,4-Man (MGMM), consistent with a random dispersion of Glc residues in  
173 the backbone—as reported in AcGGM from gymnosperm and angiosperm SCWs  
174 (Arnling Bååth et al., 2018). To help confirm these assignments, we treated the  
175 oligosaccharides with  $\beta$ -glucosidase and  $\beta$ -mannosidase, which can only fully  
176 depolymerise the backbone in the absence of  $\alpha$ -Gal branches. PACE analysis of the  
177 products indicated that  $\beta$ -glucosidase and  $\beta$ -mannosidase could convert the CSLA9-  
178 dependent oligosaccharides to monosaccharides and disaccharides (Figure 2A).  
179 Hence, we could deduce that CSLA9-dependent glucomannan has very few of these  
180  $\alpha$ -Gal branches, and that the hemicellulose is not distinguishable from AcGGM  
181 reported from other plants.

182 Next, we analysed the structure of CSLA2-dependent oligosaccharides released  
183 from *cs/a9* plants. We recently showed that the CSLA2-synthesised glucomannan in  
184 seed mucilage has a strictly repeating [4-Glc- $\beta$ -1,4-Man- $\beta$ -1,] disaccharide backbone  
185 with most of the Man residues substituted with  $\alpha$ -1,6-Gal by the MAGT1  
186 glycosyltransferase (Yu et al., 2018). Accordingly, to investigate if the  
187 oligosaccharides from etiolated seedlings were also  $\alpha$ -galactosylated by MAGT1, we  
188 performed *CjMan26A* digestions of *magt1* mutant seedling walls. The CSLA2-  
189 dependent oligosaccharides S1–S4 were absent or reduced in this mutant in all  
190 tissues, and two oligosaccharides corresponding to Glc- $\beta$ -1,4-Man (GM) and Glc- $\beta$ -  
191 1,4-Man- $\beta$ -1,4-Glc- $\beta$ -1,4-Man (GMGM) became more prominent (Figure 1 and Figure  
192 2A). Therefore, CSLA2 likely synthesises a glucomannan with a repeating GM  
193 disaccharide backbone that is  $\alpha$ -galactosylated by MAGT1.

194 To study the side chain structures in more detail, the four oligosaccharides S1–S4  
195 were subjected to a sequential glycosidase digestion (Figure 2B). Since the  
196 presence of S1 to S4 is dependent on MAGT1, we investigated whether they are



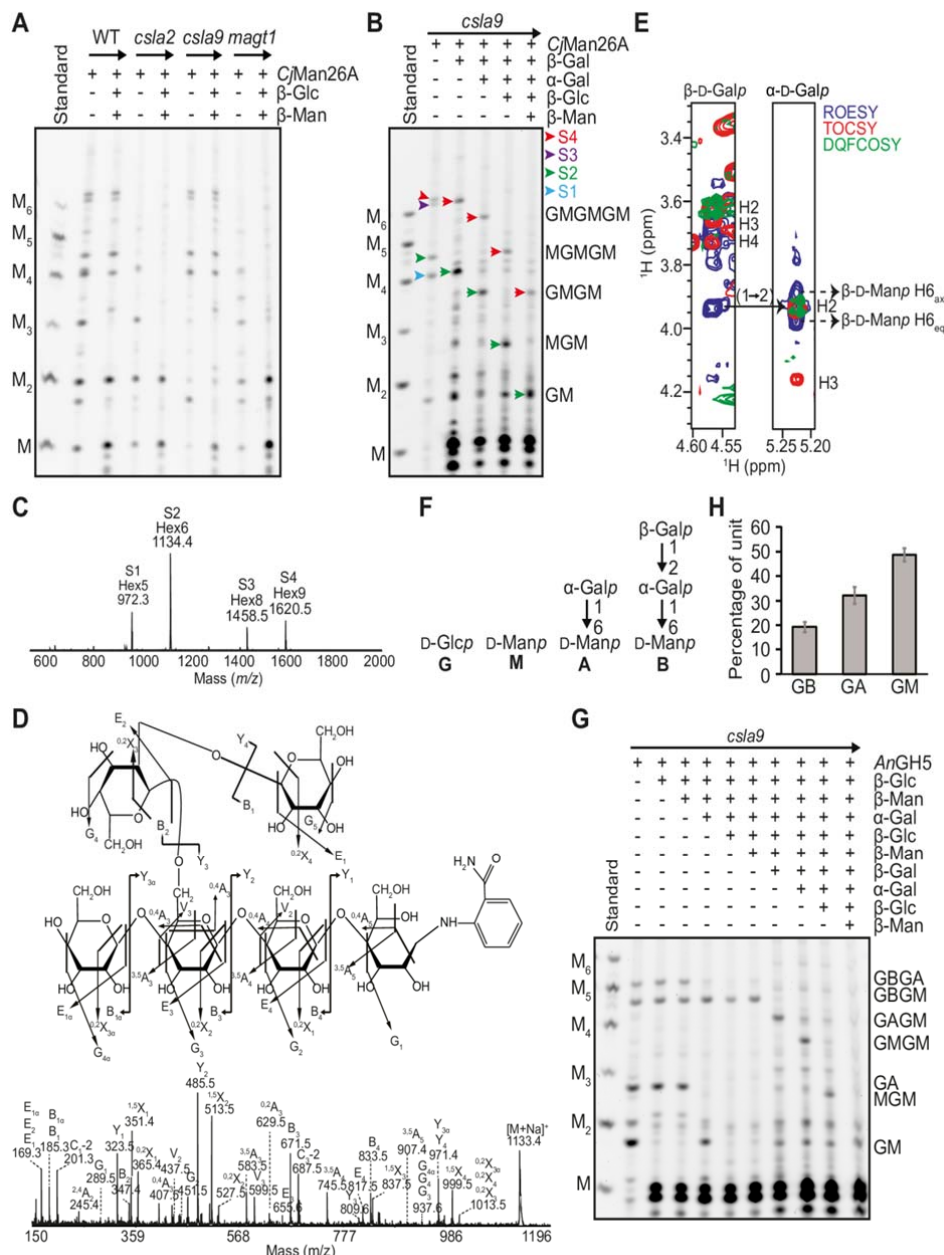

**Figure 2. Structural analysis of  $\beta$ -galactosylated glucomannan oligosaccharides from Arabidopsis young stem.** A, Characterization of glucomannan oligosaccharides released from WT, *cs1a2*, *cs1a9* and *magt1* cell walls by CjMan26A. Glucomannan from *cs1a2* is degraded into M, MM, GMM and oligosaccharides migrating near M<sub>1</sub>. Many WT and *cs1a9* glucomannan oligosaccharides are resistant to  $\beta$ -glucosidase ( $\beta$ -Glc) and  $\beta$ -mannosidase ( $\beta$ -Man) enzyme digestions, whereas oligosaccharides from *cs1a2* are reduced to mono and disaccharides. B, Degradation of  $\beta$ -galactosylated glucomannan oligosaccharides from *cs1a9* young stem analysed by PACE.  $\beta$ -galactosidase ( $\beta$ -Gal),  $\alpha$ -galactosidase ( $\alpha$ -Gal),  $\beta$ -Glc, and  $\beta$ -Man enzymes were used sequentially. C, Products of CjMan26A digestion of *cs1a9* cell walls were labelled with 2-AB and analysed by MALDI-TOF MS. The four main peaks correspond to the saccharides S1 to S4. D, S2 Hex6 in C was analysed by high-energy collision-induced dissociation (CID) MS/MS. The CID spectrum indicates that the  $\alpha$ -Gal residue is linked to the C-2 or C-3 of the  $\alpha$ -Gal. E, Nuclear magnetic resonance (NMR) analysis of S2. H-1 strip plots from 2D <sup>1</sup>H-<sup>1</sup>H TOSCY (red), ROESY (blue), and DQFCOSY (green) spectra, showing the nuclear Overhauser effect (NOE) connectivity arising from the  $\beta$ -Galp-1,2- $\alpha$ -Galp linkage. F, A single-letter nomenclature for the identified  $\beta$ -GGM backbone and possible side chains. G, Characterization of AnGH5  $\beta$ -GGM glucomannan digestion products by PACE. AnGH5 cleaves  $\beta$ -GGM from *cs1a9* young stem cell walls into GM, GA, GBGM, and GBGA oligosaccharides. H, Proportion of  $\beta$ -GGM disaccharides with different side chains from AnGH5 digestion of etiolated *cs1a9* seedling glucomannan and PACE densitometry ( $n = 4$ ). Error bars show the SD. Manno-oligosaccharide standards M to M<sub>6</sub> are shown.

198 but not S2 and S4, were altered by  $\alpha$ -galactosidase (Supplemental Figure S3A). The  
199 two  $\alpha$ -galactosidase-treated oligosaccharides could be fully hydrolysed with  
200 alternating sequential  $\beta$ -glucosidase and  $\beta$ -mannosidase treatment, indicating that  
201 they are likely GMGM and GMGMGM. We analysed all four oligosaccharides S1-S4  
202 by matrix-assisted laser desorption/ionization time-of-flight (MALDI-ToF) mass  
203 spectrometry (MS). The resultant spectra presented four main ions corresponding to  
204 S1 to S4, with mass Hex5 ( $m/z$  972.3 [M+Na]<sup>+</sup>), Hex6 ( $m/z$  1134.4 [M+Na]<sup>+</sup>), Hex8  
205 ( $m/z$  1458.5 [M+Na]<sup>+</sup>), and Hex9 ( $m/z$  1620.5 [M+Na]<sup>+</sup>) respectively (Figure 2C). We  
206 reasoned that the mass of S1 and S3 likely correspond to Hex5 and Hex8, and that  
207 they carry one and two  $\alpha$ -Gal residues, respectively. Subsequent analysis of the S1  
208 ion by collision-induced dissociation (CID) MS/MS located its  $\alpha$ -Gal branch to the first  
209 Man residue from the non-reducing end in the GMGM structure (Supplemental  
210 Figure S3B). Combined with the fact that C<sub>1</sub>Man<sub>2</sub>6A requires an unsubstituted Man  
211 at the -1 subsite for hydrolysis, these PACE and MS results indicate that all Man  
212 residues in S1 and S3 except the reducing end are  $\alpha$ -galactosylated.

213 Oligosaccharides S2 and S4 were resistant to all the above glycosidase treatments  
214 (Supplemental Figure S3A), suggesting that these oligosaccharides had additional  
215 terminal substitutions. In tobacco cell cultures and kiwifruit, a glucomannan with  $\beta$ -  
216 1,2-Gal decorations on its  $\alpha$ -1,6-Gal residues has been identified (Sims et al., 1997;  
217 Schröder et al., 2001). Interestingly, after  $\beta$ -galactosidase treatment, S2 and S4 co-  
218 migrated with S1 and S3 (Figure 2B). Sequential digestion with  $\alpha$ -galactosidase,  $\beta$ -  
219 glucosidase and  $\beta$ -mannosidase confirmed that the  $\beta$ -galactosidase products had  
220 the same structure as S1 and S3. This indicates that S2 and S4 are S1 and S3  
221 substituted with a  $\beta$ -Gal residue. Furthermore, CID MS/MS analysis of S2 showed  
222 that the second hexose from the reducing end is decorated with a hexose, which is  
223 itself substituted with a hexose, consistent with a  $\beta$ -Gal- $\alpha$ -Gal- disaccharide  
224 substitution of a backbone Man residue (Figure 2D). To confirm the linkage between  
225 the  $\beta$ -Gal and  $\alpha$ -Gal, the S2 oligosaccharide was purified and analysed by 2D NMR.  
226 <sup>1</sup>H and <sup>13</sup>C chemical-shift assignments are shown in Supplemental Table S1. The  $\beta$ -  
227 Gal residue was deduced to link to the  $\alpha$ -Gal residue *via* a 1,2-linkage due to the  
228 downfield shift of the  $\alpha$ -Gal C-2 and an intense ROE peak between  $\beta$ -Gal H-1 and  $\alpha$ -  
229 Gal H-2 (Figure 2E). Therefore, CSLA2 synthesizes a glucomannan with a repeating

230 GM disaccharide backbone, on which the Man residues may be decorated with  
231 either single  $\alpha$ -1,6-Gal or a  $\beta$ -1,2-Gal- $\alpha$ -1,6-Gal disaccharide.

232 We named this novel glucomannan  $\beta$ -GalactoGlucoMannan ( $\beta$ -GGM) because the  
233  $\beta$ -Gal is one of the distinguishing features. By analogy to the XyG naming system, a  
234 one-letter code nomenclature was adopted to simplify the depiction of the  
235 arrangement of sugars and side chains along the backbone (Figure 2F). The letters  
236 G and M represent unsubstituted Glc and Man residues respectively.  $\alpha$ -1,6-  
237 galactosylated Man residues are denoted by the letter A and the Man residues  
238 substituted by a Gal- $\beta$ -1,2-Gal- $\alpha$ -1,6- disaccharide are denoted by the letter B. Using  
239 *AnGH5*, which is a mannanase that can cleave following M or A units in a  
240 galactoglucomannan backbone (von Freiesleben et al., 2016). Digestion of  $\beta$ -GGM  
241 from the *cs/a9* young stem released four oligosaccharides (Figure 2G): GM, GA,  
242 GBGM, and GBGA. From these data, about 50% of backbone Man residues were  
243 decorated with  $\alpha$ -1,6-Gal and about 40% of these  $\alpha$ -Gal residues are further  
244 decorated with  $\beta$ -1,2-Gal (Figure 2H). Oligosaccharides with consecutive  $\beta$ -  
245 galactosylated Man residues were not seen (e.g. no GBGBGM, but GBGAGM and  
246 GBGM were seen), indicating that  $\beta$ -galactosylation is not random, but spaced at  
247 least four residues apart. Thus, in addition to the disaccharide backbone GM repeat,  
248 the  $\beta$ -GGM has a larger scale even-length pattern of at least four residues.

#### 249 **$\beta$ -GGM is widely present in eudicots**

250 We considered whether  $\beta$ -GGM might be widespread in plants. As mentioned above,  
251 oligosaccharides that could arise from  $\beta$ -GGM were previously identified in tobacco  
252 cell cultures and kiwifruit samples (Sims et al., 1997; Schröder et al., 2001). We  
253 performed *AnGH5* mannanase digestions on alkali-extracted mannan from PCW-rich  
254 samples from tomato fruits, kiwi fruits and apple fruits, representatives from the  
255 asterid and rosid eudicot clades. The  $\beta$ -GGM representative oligosaccharides GBGM  
256 and GAGM were present (Supplemental Figure S4, A to C). GBGM was digested by  
257 the  $\beta$ -galactosidase. Tomato fruit showed a higher proportion of GBGM  
258 oligosaccharide than the other plant tissues (Supplemental Figure S4), indicating  
259 that there is some variability in the level of  $\beta$ -Gal substitution of  $\beta$ -GGM.

260 We note that *Arabidopsis* seed mucilage glucomannan has a structure similar to  $\beta$ -  
261 GGM except that the  $\beta$ -Gal substitution was not reported (Yu et al., 2018). The

262 MUM2  $\beta$ -galactosidase is highly expressed in seed mucilage and has been shown to  
263 remove pectin terminal  $\beta$ -Gal (Dean et al., 2007; Macquet et al., 2007). We therefore  
264 considered the possibility that MUM2 also acts on  $\beta$ -GGM in mucilage to remove any  
265  $\beta$ -Gal decoration. To test this hypothesis, alkali-extracted *mum2* mucilage was  
266 treated with CMan26A and analysed by PACE. Minor GBGM and GBGAGM  
267 oligosaccharides were clearly present (Supplemental Figure S4D). We therefore  
268 conclude that mucilage mannan is also  $\beta$ -GGM, and it has been partly trimmed by  
269 the MUM2  $\beta$ -galactosidase. Arabidopsis mucilage glucomannan is not as unusual as  
270 previously thought (Yu et al., 2018), but another example of a tissue with  $\beta$ -GGM.

271 **AT4G13990 from GT47 clade A encodes  $\beta$ -GGM  $\beta$ -galactosyltransferase,**  
272 **MBGT1**

273 To understand the  $\beta$ -GGM biosynthesis, we attempted to identify the Mannan  $\beta$ -  
274 GalactosylTransferase (MBGT). We noted that  $\beta$ -GGM and XyG share high  
275 structural and biosynthetic similarities, summarised here and in Figure 3A. Both  
276 backbones have  $\beta$ -1,4-Glc residues in the backbone, which in  $\beta$ -GGM alternate with  
277  $\beta$ -1,4-Man residues (Man differs from Glc only in epimerisation of the C-2 OH). Both  
278 backbones are made by closely related GT2 members: the XyG backbone is  
279 synthesized by CSLCs (Cocuron et al., 2007; Liepman et al., 2007; Kim et al., 2020),  
280 while the  $\beta$ -GGM backbone is synthesized by a CSLA. Furthermore, the first side  
281 chain sugars are attached to the C-6 OH of Glc on the XyG backbone and to the C-6  
282 OH of Man on the  $\beta$ -GGM backbone. The XyG  $\alpha$ -1,6-Xyl is transferred by XXTs and  
283  $\alpha$ -1,6-Gal is transferred to  $\beta$ -GGM by MAGT1, both from the GT34 family (Scheller  
284 and Ulvskov, 2010). The disaccharide branch second sugar in  $\beta$ -GGM is  $\beta$ -1,2-Gal.  
285 The same sugar and linkage is found in XyG.

286 Given these extensive XyG and  $\beta$ -GGM similarities, we hypothesised that MBGT  
287 might be found in GT47 clade A, which contains many XyG  $\beta$ -glycosyltransferases  
288 (MUR3, XLT2, and XUT1) (Geshi et al., 2018) and also many putative GTs with no  
289 known functions (classified *At*GT11-*At*GT20 in (Li et al., 2004)). To identify MBGT  
290 candidates, we constructed a comprehensive phylogeny of GT47-A sequences from  
291 across the plant kingdom. We collected GT47-A sequences from the genomes of 96  
292 streptophytes (listed in Supplemental Table S2) and inferred an unrooted phylogeny  
293 (Figure 4). The sequences were clustered into at least seven groups: group I

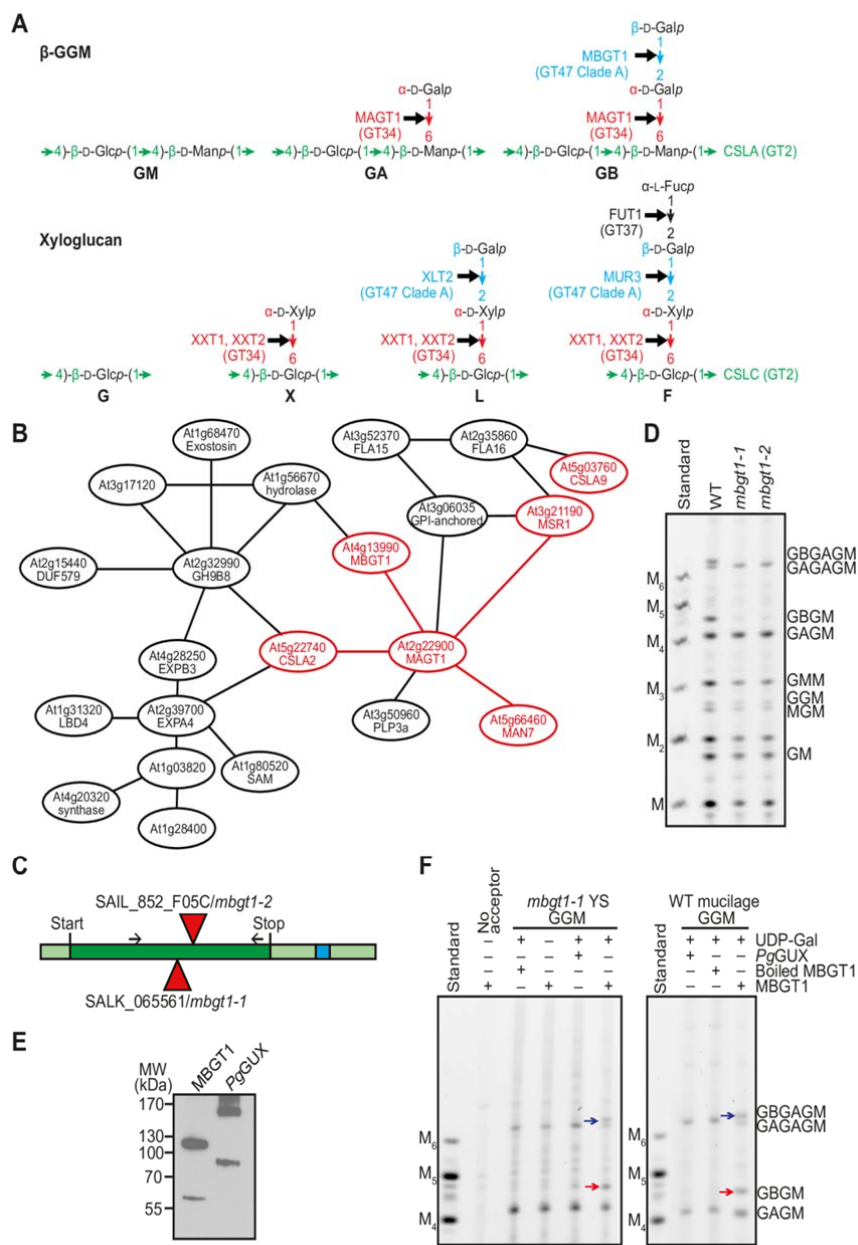

**Figure 3. AT4G13990 from CAZy GT47 Clade A encodes Arabidopsis mannan  $\beta$ -galactosyltransferase 1 (MBGT1).** A,  $\beta$ -GGM and XyG share structural and biosynthesis similarities. These two polysaccharides exhibit analogous linkages in their backbones and corresponding side chain sugars. For position in the hemicellulose, the responsible glycosyltransferases are from the same CAZy family. B, AT4G13990/MBGT1 from GT47 Clade A is in a co-expression network with CSLA2 and other mannan-related genes. C, Gene model representing *MBGT1*. Red triangles represent the position of T-DNA insertions in mutant lines analysed in this study. Dark green represents the exon. Light green represents the UTR and blue shows an intron. D, Stem material of two insertional mutants of the *MBGT1* gene was analysed by PACE by *CjMan26A*. No  $\beta$ -galactosylated oligosaccharide was detected in either *mbgt1* mutant. E, Western blot of 3 $\times$ Myc-tagged recombinant proteins expressed in *N. benthamiana*. The expected mass of 3 $\times$ Myc-MBGT1 is 64.86 kDa. The expected mass of the control enzyme 3 $\times$ Myc-PgGUX is 78.18 kDa. Both proteins form stable dimers. F, *In vitro* activity of the recombinant MBGT1 protein. In the left panel, *mbgt1-1* young stem (YS) glucomannan was used as an acceptor for MBGT1-mediated galactosylation, whereas in the right panel, WT adherent mucilage glucomannan was used. The products were analysed with PACE using digestion with *CjMan26A*. Arrows indicate band shifts after each reaction. Manno-oligosaccharide standards M to M<sub>6</sub> are shown.

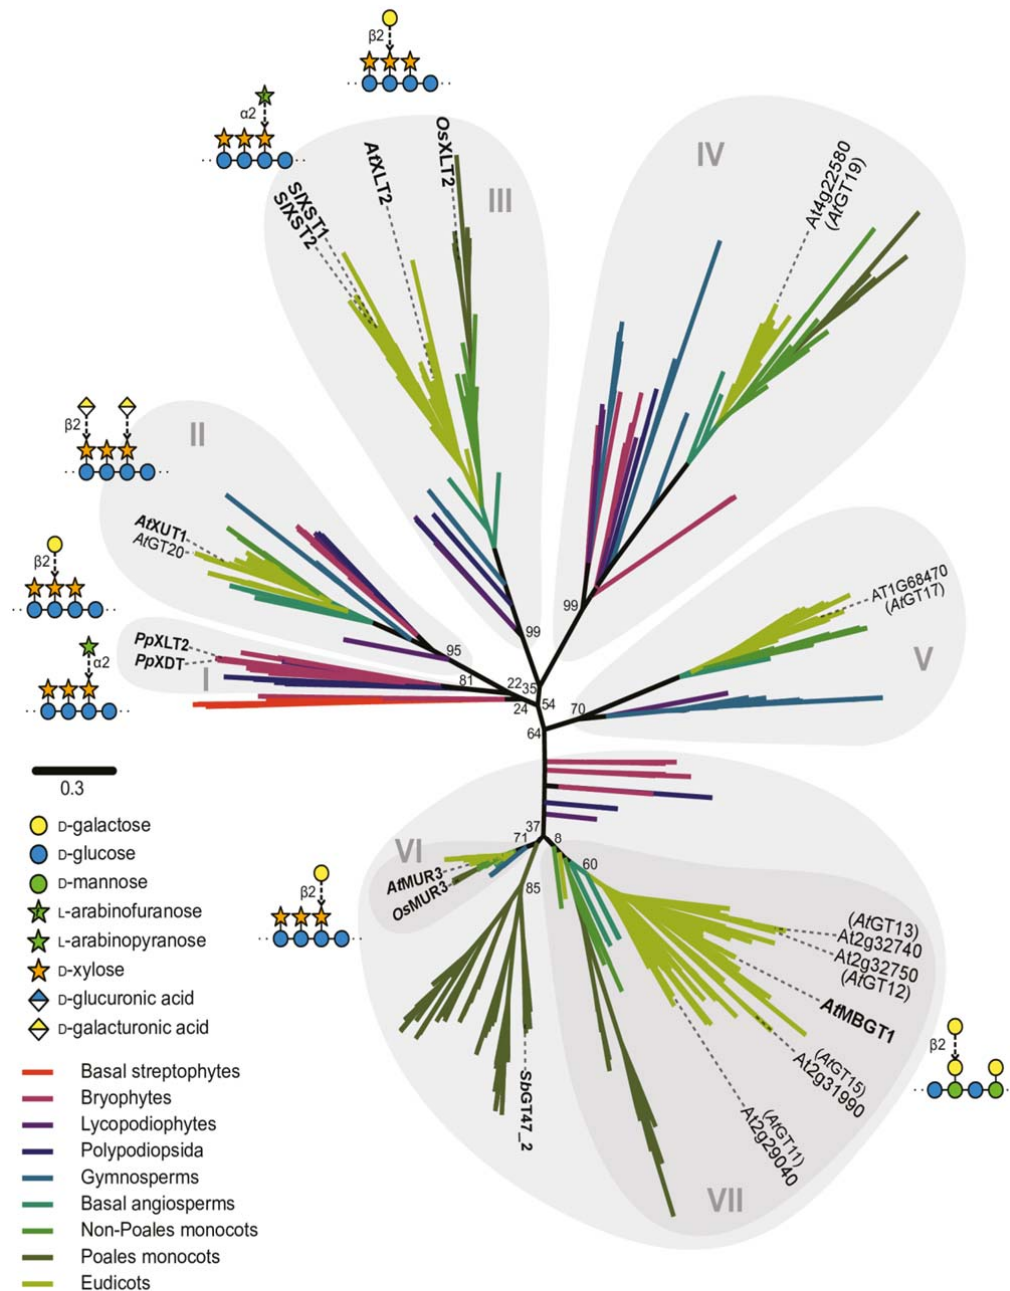

**Figure 4. Un-rooted phylogenetic tree of CAZy GT47 Clade A.** Sequences from the genomes of 96 streptophytes (Supplementary Table 2) were used to construct a comprehensive phylogeny of GT47 Clade A. Most sequences were downloaded from PLAZA (<https://bioinformatics.psb.ugent.be/plaza/>), but were supplemented with additional sequences from further genomes, derived from HMMER and TBLASTN searches. The basal streptophyte representative is *Klebsormidium nitens*, and the Lycopodiophyte representative is *Selaginella moellendorffii*. Sequences were aligned with MAFFT and truncated to leave only the predicted GT47 domain. The phylogeny was then inferred using FastTree, with 100 bootstrap pseudo-replicates. Percentage replication is indicated for important splits. The resultant tree revealed the existence of seven main subgroups within GT47-A (groups I–VII), four of which contain known XyG glycosyltransferases. The group containing MBGT was designated group VII. The activities of characterised enzymes are illustrated in SNFG format.

295 characterised *PpXLT2* and *PpXDT* enzymes from *Physcomitrium patens* (Zhu et al.,

296 2018)), group II (containing *AtXUT1* (Pena et al., 2012) and *AtGT20*), group III  
297 (*AtXLT2* (Jensen et al., 2012), *OsXLT2* from rice (Liu et al., 2015), and tomato  
298 enzymes *SXST1* and *SXST2* (Schultink et al., 2013)), group IV (*AtGT19*), group V  
299 (*AtGT17*), group VI (*AtMUR3* (Madson et al., 2003), *SMUR3* (Schultink et al., 2013),  
300 and *OsMUR3* (Liu et al., 2015)), and group VII (*AtGT11–15*). Because none of the  
301 enzymes in groups IV, V and VII had been characterised, we considered these  
302 groups to be a potential source of new activities (although *AtGT11* has recently been  
303 implicated in XyG synthesis in pollen tubes (Wei et al., 2021)). Accordingly, for each  
304 Arabidopsis gene within these GT47-A groups, we analysed its co-expression using  
305 the co-expression database tool ATTED-II (Obayashi et al., 2018). Interestingly, we  
306 found that *At4g13990* (*AtGT14*, group VII) is co-expressed with the glucomannan  
307 biosynthetic enzymes *CSLA2*, *MAGT1*, and *MSR1* (Figure 3B). Hence, we  
308 considered the possibility that *At4g13990* could encode MBGT.

309 To assess the potential role of *At4g13990/AtGT14* in  $\beta$ -galactosylation of  $\beta$ -GGM,  
310 cell walls from young stems of two homozygous knockout *At4g13990* lines (named  
311 *mbgt1-1* and *mbgt1-2*, Figure 3C) were digested with *CjMan26A*, and the products  
312 were analysed by PACE. Remarkably, both mutant lines lacked the  $\beta$ -galactosylated  
313  $\beta$ -GGM oligosaccharides (Figure 3D), indicating that this enzyme is required for  
314 normal  $\beta$ -galactosylation of  $\beta$ -GGM.

315 To confirm the activity of *At4g13990/AtGT14*, we conducted an assay for MBGT  
316 activity *in vitro* using *AT4G13990* protein transiently expressed in tobacco leaves.  
317 Alkali-treated cell wall materials from *mbgt1-1* young stem and WT adherent  
318 mucilage, rich in  $\beta$ -GGM but lacking the  $\beta$ -galactosylation (Yu et al., 2018), were  
319 used as acceptors. To detect  $\beta$ -galactosylated glucomannan, the assay products  
320 were digested with mannanase *CjMan26A* and analysed by PACE. In the presence  
321 of UDP-Gal and microsomes from tobacco expressing *At4g13990/AtGT14*,  $\beta$ -GGM  
322 oligosaccharides were produced from mucilage and young stem acceptors (Figure 3,  
323 E and F). In contrast, when microsomes from tobacco over-expressing *Picea glauca*  
324 GlucUronic acid substitution of Xylan (*PgGUX1*) (Lyczakowski et al., 2017) were  
325 used as the control enzyme, no  $\beta$ -galactosylation was detected. Taken together with  
326 the mutant plants, these results confirm that *At4g13990/AtGT14* encodes MBGT,  
327 and so we named it MBGT1.

328 **Arabidopsis mutants in  $\beta$ -GGM and XyG side chain structure show negative**  
329 **genetic interactions**

330 The structural and biosynthetic relationships between  $\beta$ -GGM and XyG suggest that  
331 these two polysaccharides may play related functions *in vivo*. If our hypothesis is  
332 correct,  $\beta$ -GGM biosynthesis disruption might exacerbate the phenotypes of XyG  
333 synthesis mutants.

334 Mutant plants lacking  $\beta$ -GGM  $\beta$ -Gal (*mbgt1-1*) grew indistinguishably from wild type  
335 plants (Figure 5). An analogous mutant in XyG is *mur3-3*, which lacks the third  
336 position  $\beta$ -Gal. It has a cabbage-like growth phenotype with curled rosette leaves,  
337 and short stems (Tamura et al., 2005; Tedman-Jones et al., 2008). We generated  
338 *mbgt1-1 mur3-3* double mutant plants. As expected, they had no detectable  $\beta$ -GGM  
339 with B units and XyG with no third position L and F ( $\beta$ -Gal further substituted with  
340 Fuc) units (Supplemental Figure S5, A and B). Interestingly, these  $\beta$ -GGM and XyG  
341 double mutants had a smaller rosette than *mur3-3*, with more severely curled rosette  
342 leaves (Figure 5A). In addition, the inflorescence stem was shorter than the *mur3-3*  
343 single mutant plants (Figure 5 C). The allelic Arabidopsis *mur3-1* mutant, with a  
344 single-point mutation in MUR3 (Madson et al., 2003; Jensen et al., 2012) also has  
345 defective XyG. For unclear reasons, this XyG mutant does not exhibit a cabbage  
346 phenotype, but the plants are shorter and has an increased number of rosette and  
347 cauline branches than WT (Jensen et al., 2012). To test for genetic interactions with  
348 this allele, we generated *mbgt1-1 mur3-1* double mutant plants. Compared to the  
349 single mutant *mur3-1* plants, the *mbgt1-1 mur3-1* double mutant was significantly  
350 shorter and had more cauline branches (Figure 5, B-F). The increased severity of the  
351 *mur3-1* phenotypes when combined with *mbgt1-1* indicates that  $\beta$ -galactosylation of  
352  $\beta$ -GMM is important for  $\beta$ -GMM function, and suggests that the disaccharide side  
353 chains in both polysaccharides have similar functions.

354 **Arabidopsis mutants lacking  $\beta$ -GGM and XyG show negative genetic**  
355 **interactions**

356 The *xxt1 xxt2* mutant, lacking detectable amounts of XyG, exhibits some  
357 morphological phenotypes in many tissues, yet the plants are able to grow relatively  
358 normal. To investigate if the absence of  $\beta$ -GGM exacerbates the phenotype of these  
359 plants, we crossed the *cs1a2* mutant with *xxt1 xxt2*. As previously reported,



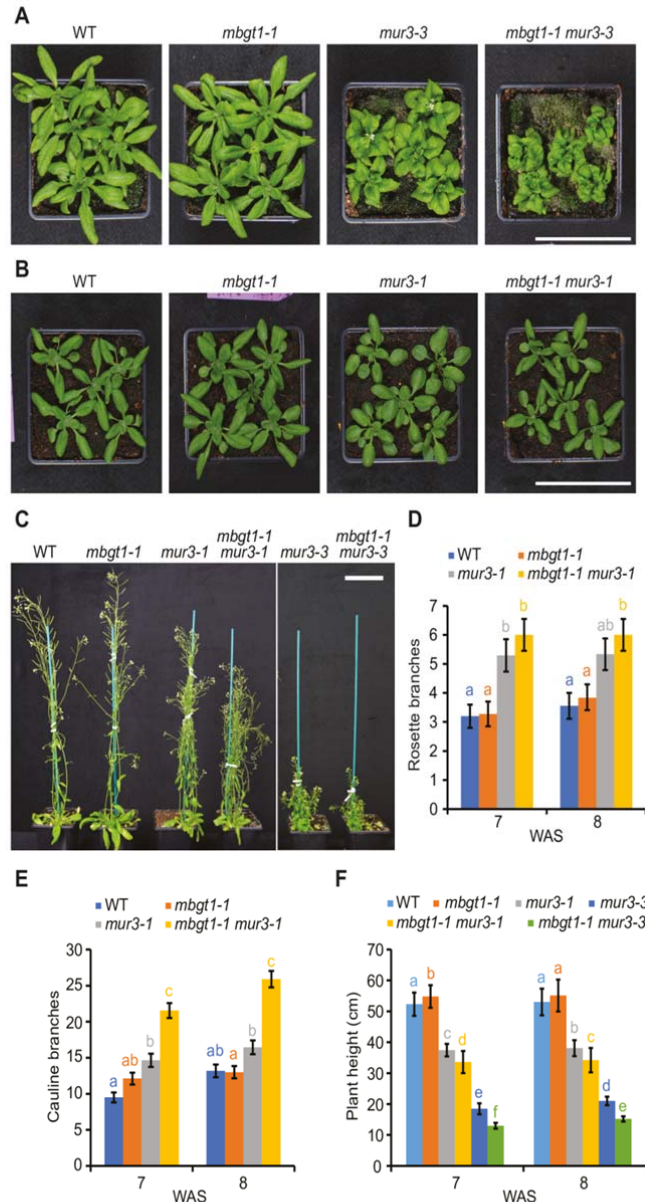

**Figure 5. The importance of  $\beta$ -galactosylation of  $\beta$ -GGM is revealed in the XyG  $\beta$ -galactosylation mutant *mur3*.**

A, Four-week-old rosettes of *mur3-3* T-DNA insertion mutant and *mbgt1-1 mur3-3* double mutant. B, Four-week-old rosettes of *mur3-1* point mutant and *mbgt1-1 mur3-1* double mutant. C, Six-week-old plants, showing dwarfing of the *mur3* and *mbgt1-1 mur3* double mutants. D, E Quantification of the number of rosette branches (D) and cauline branches (E) for 7 and 8-week-old *mur3-1* and *mbgt1-1 mur3-1* plants. *mbgt1-1 mur3-1* mutants show no significant change in rosette branches, but a significant increase in cauline branches compared to *mur3-1*. Data were modelled by Poisson regression; a likelihood ratio test indicated a significant contribution of genotype in determining the number of stems (Rosette branches 7 weeks:  $n = 75$ ,  $G^2_3 = 26.2$ ,  $p = 8.6 \times 10^{-6}$ ; 8 weeks:  $n = 74$ ,  $G^2_3 = 16.6$ ,  $p = 8.4 \times 10^{-4}$ ). Cauline branches 7 weeks:  $n = 75$ ,  $G^2_3 = 109$ ,  $p < 2.2 \times 10^{-16}$ ; 8 weeks:  $n = 73$ ,  $G^2_3 = 144$ ,  $p = 1.5 \times 10^{-24}$ ). Results of post-hoc pairwise comparisons (within each time point) are indicated by compact letter display (letter sharing indicates lack of significant difference i.e. where  $p > 0.05$ ). Data were modelled by Poisson regression; a likelihood ratio test indicated a significant contribution of genotype in determining the number of stems (Rosette branches 7 weeks:  $n = 75$ ,  $G^2_3 = 26.2$ ,  $p = 8.6 \times 10^{-6}$ ; 8 weeks:  $n = 74$ ,  $G^2_3 = 16.6$ ,  $p = 8.4 \times 10^{-4}$ ). Cauline branches 7 weeks:  $n = 75$ ,  $G^2_3 = 109$ ,  $p < 2.2 \times 10^{-16}$ ; 8 weeks:  $n = 73$ ,  $G^2_3 = 144$ ,  $p = 1.5 \times 10^{-24}$ ). Error bars represent standard error of the mean. F, Quantification of plant height for 7 and 8-week-old plants. One-way ANOVA indicated a significant contribution of genotype in determining plant height at both timepoints (7 weeks:  $n = 208$ ,  $F_{5,202} = 1257$ ,  $p < 2 \times 10^{-16}$ ; 8 weeks:  $n = 200$ ,  $F_{5,194} = 760$ ,  $p < 2 \times 10^{-16}$ ). Results of post-hoc pairwise comparisons (within each time point) are indicated by compact letter display. Apart from the significant difference between WT and *mbgt1-1* at 7 weeks, where  $p = 0.0066$ ,  $p < 1 \times 10^{-6}$  for all significant differences. Error bars represent standard deviation. WAS, week after sowing. Scale bars = 9 cm.

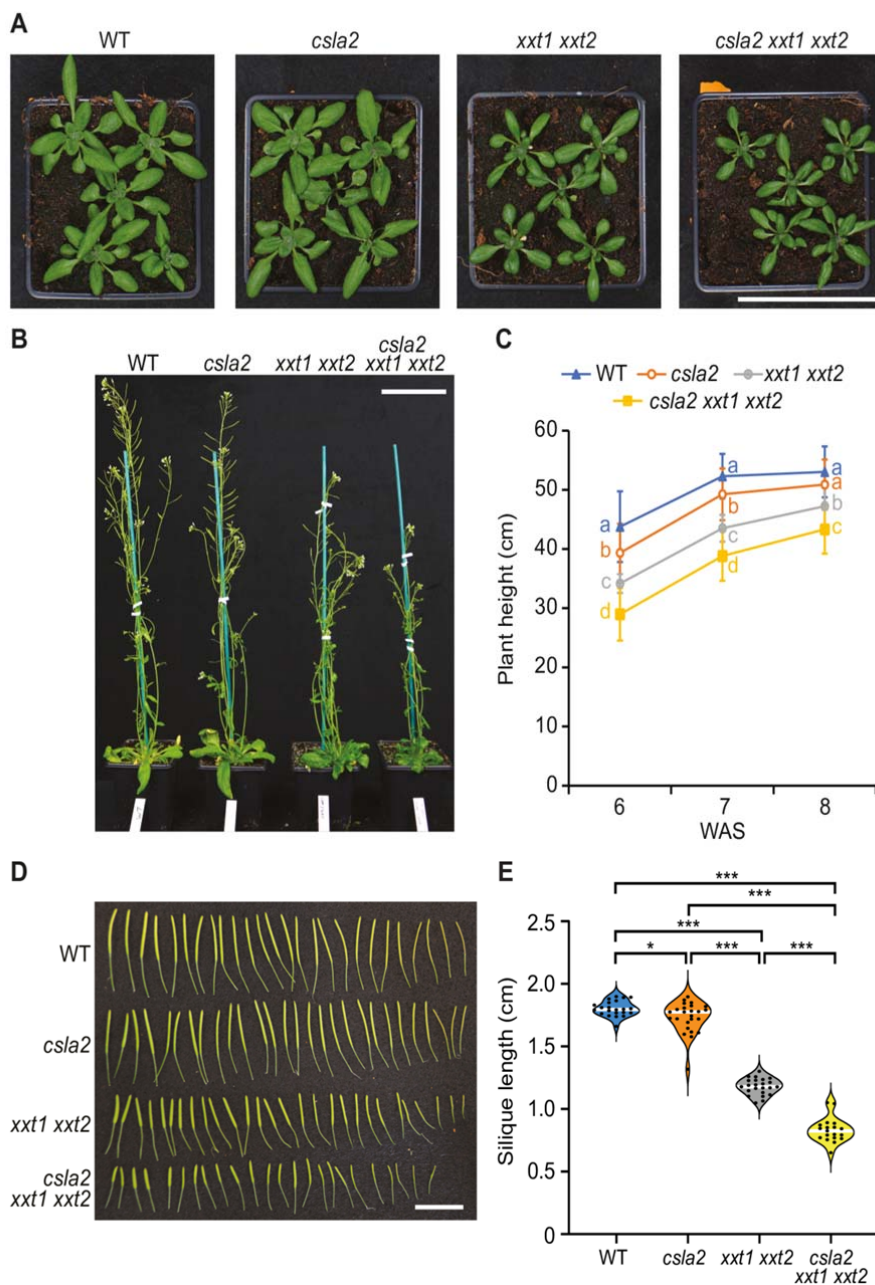

**Figure 6.  $\beta$ -GGM function in primary cell walls is revealed when the XyG is missing.** A, Four-week-old rosettes. Scale bar = 9 cm. B, Six-week-old plants. Scale bar = 9 cm. C, Quantification of plant height for 6, 7, and 8-week-old plants. One-way ANOVA indicated a significant contribution of genotype in determining plant height at all three timepoints (6 weeks:  $n = 131$ ,  $F_{3,127} = 65.0$ ,  $p < 2 \times 10^{-16}$ ; 7 weeks:  $n = 136$ ,  $F_{3,132} = 88.2$ ,  $p < 2 \times 10^{-16}$ ; 8 weeks:  $n = 131$ ,  $F_{3,127} = 35.8$ ,  $p < 2 \times 10^{-16}$ ). Results of post-hoc pairwise comparisons (Tukey's honest significant difference) are indicated by compact letter display. For all significant differences,  $p < 0.001$  apart from WT-*csla2* at week 7 ( $p = 0.0063$ ) and *csla2*-*xxt1 xxt2* at week 8 ( $p = 0.0026$ ). D, Siliques from 7-week-old plants. Scale bar = 2 cm. E, Violin plot of silique length. Siliques from more than three plants were measured for each genotype. Black circles indicate individual measurements; white lines represent the group mean, and error bars indicate standard deviation. One-way ANOVA indicated a significant contribution of genotype in determining plant height at all three time points ( $n = 89$ ,  $F_{3,85} = 553$ ,  $p < 2 \times 10^{-16}$ ). Results of post-hoc pairwise comparisons (Tukey's honest significant difference; WT,  $n = 22$ ; *csla2*,  $n = 25$ ; *xxt1 xxt2*,  $n = 23$ ; *csla2 xxt1 xxt2*,  $n = 19$ ) are indicated with asterisks.

361 diameter, somewhat shorter plants at 8 weeks, and shorter siliques (Kong et al.,

2015) (Figure 6). The *csla2* mutant plants, lacking  $\beta$ -GGM, grew normally. Interestingly, the *csla2 xxt1 xxt2* mutant plants, lacking both  $\beta$ -GGM and XyG (Supplementary Figure 5C), had a more severe phenotype with slightly changed rosette appearance, significantly shorter stems at 6 to 8 weeks and shorter siliques than *xxt1 xxt2* (Figure 6).

Next, we investigated if the *xxt1 xxt2* phenotype in etiolated hypocotyls was affected by the loss of  $\beta$ -GGM. Plant lines were grown on MS plates in the dark for between 3 and 7 days to measure hypocotyl length. Hypocotyl length differences between the mutants became evident 4 days after germination. Up to day 7, no significant difference was observed between *csla2* and WT seedlings. *xxt1 xxt2* seedlings were shorter than those of WT, consistent with previously published results (Xiao et al., 2016). *csla2 xxt1 xxt2* etiolated seedlings exhibited even shorter hypocotyls than those of *xxt1 xxt2* (Figure 7, A and B). In addition, the *csla2 xxt1 xxt2* seedlings have perturbed growth showing some twisting of hypocotyls (Figure 7A). These results suggest that  $\beta$ -GGM and XyG have connected functions in normal plant development.

### Defects in cell elongation and cellulose microfibril organisation

To investigate the developmental changes in  $\beta$ -GGM and XyG mutants, we imaged four-day-old etiolated hypocotyls by cryo-SEM and studied the epidermal cell lengths. Compared to WT, the *xxt1 xxt2* mutant exhibited a small reduction in cell length, while the *csla2 xxt1 xxt2* exhibits a larger reduction (Figure 7, C and D). To better visualize the differences in cell expansion along the hypocotyl, we imaged and computationally segmented the hypocotyl cells of the *xxt1 xxt2* and *csla2 xxt1 xxt2* mutants. A heat map of cell length demonstrates cells are consistently shorter in the *csla2 xxt1 xxt2* mutant along the whole hypocotyl (Figure 7E). The data suggest cell expansion is further reduced, compared to the loss of XyG alone, by the absence of both  $\beta$ -GGM and XyG.

XyG mutants have revealed the importance of the polysaccharide for normal cellulose fibril arrangements and wall formation (Xiao et al., 2016; Kim et al., 2020). We hypothesised that loss of  $\beta$ -GGM and XyG may affect cell elongation by altering cellulose microfibril arrangements. We processed and stained the cellulose using pontamine fast scarlet 4B dye (Thomas et al., 2017) and imaged epidermal cells

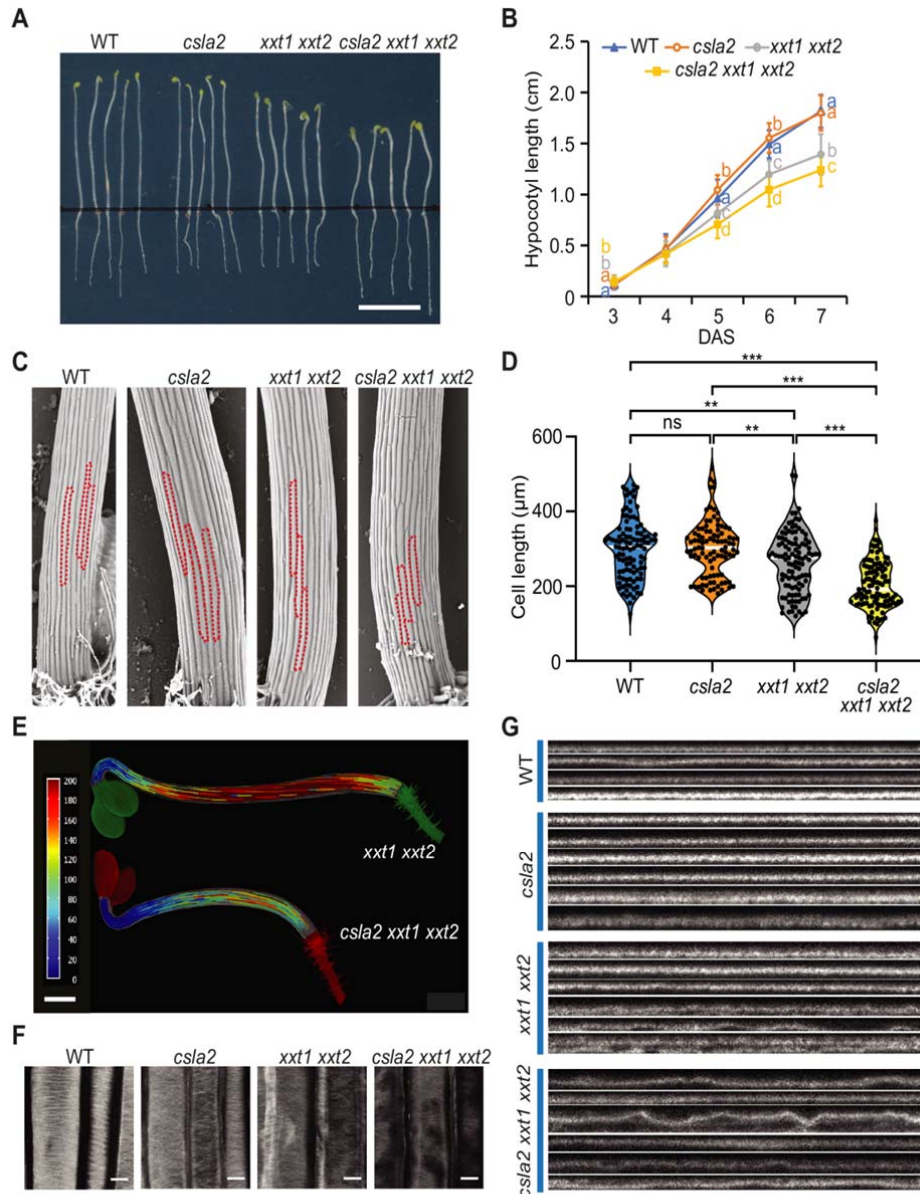

**Figure 7. A role of  $\beta$ -GGM in cell expansion and cellulose organisation.** A, Six-day-old hypocotyls grown on MS medium with sucrose. Scale bar = 1 cm. B, Quantification of hypocotyl length for 3- to 6-day-old seedlings ( $n \geq 40$  seedlings for each point per genotype). DAS, days after sowing. Error bars represent standard deviation. Although one-way ANOVA indicated no significant difference between genotypes at 4 days ( $n = 213$ ,  $F_{3,209} = 2.58$ ,  $p = 0.054$ ), a significant difference was seen at 3 days, 5 days and after (3 days:  $n = 197$ ,  $F_{3,193} = 40.7$ ,  $p < 2 \times 10^{-16}$ ; 5 days:  $n = 276$ ,  $F_{3,272} = 82.8$ ,  $p < 2 \times 10^{-16}$ ; 6 days:  $n = 271$ ,  $F_{3,267} = 177$ ,  $p < 2 \times 10^{-16}$ ; 7 days:  $n = 245$ ,  $F_{3,241} = 167$ ,  $p < 2 \times 10^{-16}$ ). Results of post-hoc pairwise comparisons (Tukey's honest significant difference) are indicated by compact letter display. C, Cryo-SEM analysis of 4-day-old etiolated hypocotyls from WT and mutant plants. Individual cells in the tissue are outlined. Cells are shorter in the *csla2 xxt1 xxt2* triple mutant than in the *xxt1 xxt2* double mutant. Scale Bar = 100  $\mu\text{m}$ . D, Quantification of cell length of 4-day-old hypocotyls. Black circles indicate individual measurements; white lines represent the group mean. One-way ANOVA indicated a significant contribution of genotype in determining hypocotyl cell length ( $n = 413$ ,  $F_{3,409} = 40.44$ ,  $p < 2 \times 10^{-16}$ ). Results of post-hoc pairwise comparisons (Tukey's honest significant difference) are indicated by asterisks (\*  $p < 0.05$ , \*\*  $p < 0.01$ , \*\*\*  $p < 0.001$ ). E, Heatmap showing 4-day-old hypocotyl cell length. Scale Bar = 500  $\mu\text{m}$ . F, G Four-day-old hypocotyls were stained with Pontamine S4B and then observed under a confocal microscope. Representative image of hypocotyl primary cell wall (F). A survey of orthogonal views showing the profile of the hypocotyl primary cell wall (G). Scale bars = 10  $\mu\text{m}$ .

395 observed for WT and *csla2* and these bundles were less defined with areas of  
396 missing signal in the *xxt1 xxt2* and *csla2 xxt1 xxt2* mutants suggesting uneven walls.  
397 Orthogonal profiles along the cell length and through the stained walls show thin and  
398 even walls for WT and *csla2*, but uneven, “rippled” profiles for *xxt1 xxt2*. This effect is  
399 worsened in *csla2 xxt1 xxt2* (Figure 7G). Although the features could be an effect of  
400 the processing steps of pontamine staining, they reveal differences in the cellulose  
401 arrangements in the cell walls of the mutants that are dependent on the presence of  
402  $\beta$ -GGM and XyG.

### 403 **$\beta$ -GGM has low mobility in primary cell walls.**

404 Hemicellulose polysaccharides that are bound to cellulose are relatively immobile in  
405 the cell wall (Bootten et al., 2004). Solid-state NMR (ssNMR) can be used to  
406 distinguish more mobile constituents from these relatively immobile polymers. For  
407 example,  $^{13}\text{C}$  cross-polarisation (CP)-magic-angle spinning (MAS) ssNMR has been  
408 used to study xyloglucan, xylan and glucomannan bound to cellulose. On the other  
409 hand, soluble polymers can be seen by direct polarisation (DP)-MAS ssNMR (Metz  
410 et al., 1994; Simmons et al., 2016; Cresswell et al., 2021). Because of the relatively  
411 low abundance of  $\beta$ -GGM in plants, and to study a simplified PCW, we exploited  
412 Arabidopsis callus cultures of hemicellulose biosynthesis mutants. Compared to  
413 seedlings, Arabidopsis callus cultures are relatively homogenous and reproducible  
414 between many genotypes. The cells synthesise polysaccharides typical of primary  
415 cell walls (Prime et al., 2000; Nikolovski et al., 2012) and can be labelled by growing  
416 with  $^{13}\text{C}$ -glucose. This enables two-dimensional spectra, in particular using the  
417 through-bond refocused INADEQUATE experiment, to be recorded. Such spectra of  
418 wild type callus cells are observed to be complex, and XyG signals dominate  
419 (Supplementary Figure S7). Thus, we generated *irx9l xxt1 xxt2* callus cultures to  
420 remove both XyG and xylan to simplify the spectra as much as possible, leaving  $\beta$ -  
421 GGM as the main hemicellulose. To help in assigning the  $\beta$ -GGM signals in the  
422 spectra, we also generated and analysed a *csla2 xxt1 xxt2* mutant callus, which  
423 lacks the  $\beta$ -GGM as well as XyG (Supplemental Figure S6, Supplementary Table  
424 S1). We carried out ssNMR on cell walls without drying or pretreatments, to preserve  
425 native arrangements of polymers as much as possible. Figure 8 shows that both  
426 Man residues and  $\alpha$ -Gal branches of  $\beta$ -GGM can be seen in a  $^{13}\text{C}$  CP-  
427 INADEQUATE MAS NMR spectrum that detects relatively immobile polymers such

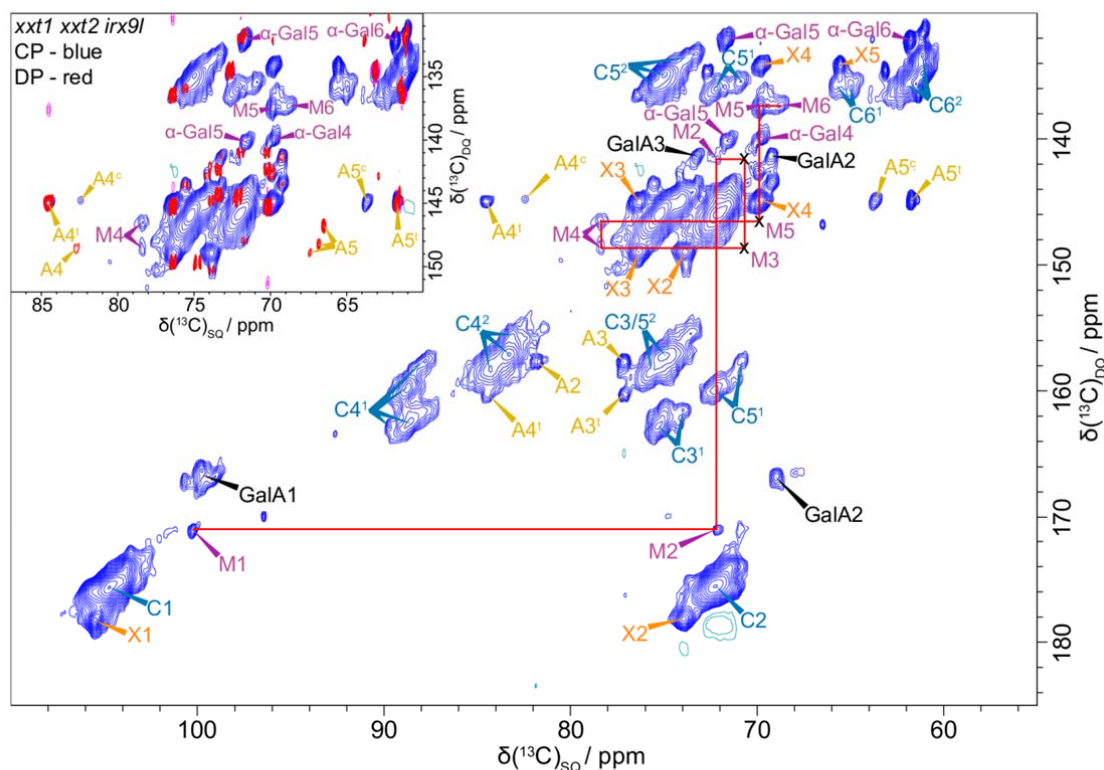

**Figure 8.**  $^{13}\text{C}$  CP- and DP-refocused INADEQUATE MAS solid-state NMR spectra show the  $\beta$ -GGM peaks in *irx91 xxt1 xxt2* callus. The  $\beta$ -GGM peaks are labelled: mannose (M) and  $\alpha$ -Gal. Also labelled are the main cellulose peaks (domain 1, C<sup>1</sup>; domain 2, C<sup>2</sup>), galacturonic acid (GalA) of pectin, and a terminal xylose (X) linked to an unknown polymer. A terminal arabinose (A) and another arabinose (A<sup>c</sup>) are also labelled. The inset shows an overlay of the CP (blue) and DP (red) INADEQUATE spectra for the M5, M6 region. It is clear that M5 and M6 are not visible in the DP spectrum, i.e. are not mobile. Spectra were acquired at a  $^{13}\text{C}$  Larmor frequency of 251.6 MHz and a MAS frequency of 12.5 kHz. The spin-echo duration used was 2.24 ms.

428 as cellulose and bound hemicelluloses. The  $^{13}\text{C}$  NMR chemical shifts of these  $\beta$ -  
 429 GGM residues are consistent with those from extracted Kiwi fruit glucomannan  
 430 (Schröder et al., 2001) (Supplemental Table 1), supporting the assignments.  $\beta$ -Gal  
 431 was not detected in the solid-state NMR spectra, perhaps due to lower frequency or  
 432 higher mobility of this substitution. The similarity in  $^{13}\text{C}$  shifts to the previous solution-  
 433 state assignments suggests that there are no major  $\beta$ -GGM conformational  
 434 differences in the cell wall. The  $^{13}\text{C}$  shifts of these  $\beta$ -GGM residues are distinct from  
 435 those of AcGGM (Terrett et al., 2019; Cresswell et al., 2021), consistent with the  
 436 different chemical structure of these polymers. Importantly, like XyG and cellulose,  $\beta$ -  
 437 GGM was not detected in DP-INADEQUATE spectra, in which mobile polymers are  
 438 seen. Having assigned the  $\beta$ -GGM spectral peaks, we similarly investigated WT cell  
 439 walls, and confirmed  $\beta$ -GGM is also detectable in CP-INADEQUATE spectra in the

440 presence of the XyG and xylan (Supplementary Figure S7). Due to the low  
441 abundance of  $\beta$ -GGM, we have not been able to conduct through-space ssNMR  
442 experiments to investigate  $\beta$ -GGM proximity with cellulose. Nevertheless, the  
443 experiments indicate that  $\beta$ -GGM has limited mobility in the wall consistent with  
444 binding to cellulose.

445

## 446 **Discussion**

447 XyG has been the focus of eudicot PCW hemicellulose functional studies because of  
448 its abundance, and it is the only eudicot hemicellulose with a clear role in cell wall  
449 elongation (Burton et al., 2010; Park and Cosgrove, 2015). Here, we report a  
450 widespread patterned glucomannan that shows structural and biosynthetic  
451 similarities to XyG, which we name  $\beta$ -GGM (Supplemental Figure S1). These two  
452 polysaccharides have related roles in cell elongation in plant development, with a  
453 role of  $\beta$ -GGM becoming more evident in tissues or mutants without functional XyG.  
454 Studies of the role of hemicelluloses in PCW architecture and function should now  
455 consider contributions by both polysaccharides.

456 The glucomannan and XyG biosynthetic enzymes are evolutionarily related (Yin et  
457 al., 2009; Wang et al., 2020). The  $\beta$ -GGM backbone is synthesized by CSLA2 in  
458 Arabidopsis, a CAZy family GT2 enzyme. Within plant GT2 enzymes, the CSLA  
459 enzymes are most closely related to the CSLC family (Mikkelsen et al., 2014; Wang  
460 et al., 2020), which are the XyG backbone synthases (Cocuron et al., 2007; Kim et  
461 al., 2020). In Arabidopsis, CSLA9 is required for biosynthesis of AcGGM, the random  
462 patterned, acetylated glucomannan in tissues with SCWs (Goubet et al., 2009).  
463 Therefore, there may be functional specialisation within the CSLA enzyme family.  
464 Whether the ability to make the patterned backbone for  $\beta$ -GGM is intrinsic to specific  
465 CSLA enzymes or induced by factors such as MSR proteins (Voiniciuc et al., 2019;  
466 Robert et al., 2021) remains to be investigated in plants. The land plant GT2 CSLAs  
467 have evolved from the streptophyte algal CSLA/K family (Wang et al., 2020) which is  
468 likely to synthesise a mannan. There is no report to our knowledge of glucomannans  
469 before the evolution of land plants, so this enzyme may synthesise a homomannan.  
470 The early land plants have been reported to have an acetylated glucomannan  
471 (Geddes and Wilkie, 1972; Popper and Fry, 2003; Nothnagel and Nothnagel, 2007;  
472 Zhang et al., 2014), suggesting that glucomannans are a land plant adaptation. The  
473 side chain biosynthesis of  $\beta$ -GGM and XyG is also related. The  $\alpha$ -1,6-  
474 galactosyltransferase MAGT1 for  $\beta$ -GGM and  $\alpha$ -1,6-xylosyltransferase XXTs for XyG  
475 are all from the GT34 families (Scheller and Ulvskov, 2010; Yu et al., 2018). We  
476 recently showed that MAGT1 activity has the ability to galactosylate Man in the  
477 patterned  $\beta$ -GGM backbone (Yu et al., 2018), but other MAGTs may show



478 preferences for different Man or Glc residue arrangements. Here, we also identified  
479 the enzyme making the  $\beta$ -1,2-Gal disaccharide branch, MBGT1. It is from GT47  
480 Clade A, which contains the XyG  $\beta$ -1,2-Gal transferases amongst many other XyG  
481 active enzymes. These extensive similarities in biosynthetic enzymes may imply that  
482  $\beta$ -GGM and XyG have a common ancient evolutionary origin, for example in  
483 streptophyte algae where XyG and CSLA/K were present (Mikkelsen et al., 2014;  
484 Mikkelsen et al., 2021). In this scenario, both polysaccharides persisted through land  
485 plant evolution to modern eudicots. Alternatively, the  $\beta$ -GGM biosynthesis may have  
486 arisen during land plant evolution from the acetylated glucomannan biosynthesis  
487 pathway. We have not yet studied the presence of  $\beta$ -GGM across the plant kingdom,  
488 and so we are unable to determine yet whether the ability to make  $\beta$ -GGM is ancient  
489 or alternatively arose during land plant evolution. Evolution of the synthesis  $\beta$ -GGM  
490 would require divergence of CSLAs to make the patterned vs unpatterned  
491 backbones, specialisation of GT34s to add galactose to the patterned backbone, and  
492 alteration of a XyG GT47 activity for generation of the  $\beta$ -GGM disaccharide side  
493 chains. This second hypothesis would also imply that the  $\beta$ -GGM biosynthesis  
494 pathway has evolved to converge on a glucomannan structure closely related to  
495 XyG, an idea that raises interesting questions about the importance of this structure  
496 for function of both of the polysaccharides.

497 The molecular structure of hemicellulose polysaccharides influences their solubility  
498 and ability to interact with other cell wall components in ways that are not fully  
499 understood. It is notable that  $\beta$ -GGM has similarities in structure to XyG, suggesting  
500 their backbones and arrangements of branches confer beneficial properties. One  
501 distinguishing feature of  $\beta$ -GGM over the previously described AcGGM is the  
502 possession of disaccharide branches. What could be the advantage of this  
503 structure? The side chains might affect binding to cellulose in the cell wall. *In vitro*  
504 assays showed branches influence the XyG-bacterial cellulose interactions (Lopez et  
505 al., 2010), however, there is no clear evidence of an influence on XyG binding in  
506 plant cell walls. Second, the side chains may be important for recognition by cell wall  
507 modifying enzymes such as XTHs and mannanases (Pena et al., 2004; Schröder et  
508 al., 2006; Li et al., 2013; Ishida and Yokoyama, 2022). Thirdly, these side chains  
509 might influence solubility of the polymers. The *mur3-1 xlt2* double mutant (with  
510 mostly non-substituted XyG composed of XXXG units) can be partially or fully

511 rescued by the addition of D-Gal, L-Araf, or L-Arap at the second or third Xylp  
512 residue. This suggests that the disaccharide substitution frequency of XyG is an  
513 important parameter for XyG function, but perhaps not the identity or position of the  
514 substituted chains (Schultink et al., 2013; Zhu et al., 2018). Thus, a large decrease in  
515 XyG substitution in *mur3-3* causes a phenotype, while the smaller decrease in XyG  
516  $\beta$ -Gal in the *xlt2* mutant has no effect. The loss of the side chains may promote  
517 inappropriate intracellular interactions of XyG or  $\beta$ -GGM, leading to the formation of  
518 membrane aggregates and Golgi secretion disruption (Madson et al., 2003; Zhao et  
519 al., 2019). This hypothesis is supported by the fact that the *mur3* phenotype is  
520 rescued by plant growth in increased temperature (Shirakawa et al., 1998; Kong et  
521 al., 2015). We showed that loss of  $\beta$ -galactosylation of  $\beta$ -GGM exacerbates the *mur3*  
522 XyG galactosylation mutant phenotypes, indicating a role for this  $\beta$ -Gal disaccharide  
523 side chain.

524 We were able to show using ssNMR that  $\beta$ -GGM is relatively immobile in the cell  
525 wall, consistent with binding of this hemicellulose to cellulose. In spruce wood, the  
526 AcGGM was found by ssNMR to have close proximity to the cellulose surface. It was  
527 further suggested that AcGGM binds to the cellulose surface in a two-fold screw  
528 conformation distinct from the soluble AcGGM conformation (Terrett et al., 2019).  
529 Here, based on the similarity of  $^{13}\text{C}$  NMR chemical shifts, we found no evidence for a  
530 change in conformation of the  $\beta$ -GGM between solution or in the intact cell wall.  
531 Recent molecular dynamics simulations of glucomannan suggest that the backbone  
532 Glc residues may promote maintenance of glycosidic bond angles consistent with a  
533 two-fold screw, through inter-residue H-bonding as seen in cellulose (Berglund et al.,  
534 2016; Berglund et al., 2019; Martinez-Abad et al., 2020). Perhaps a consequence of  
535 the disaccharide GM repeat is the maintenance of a flattened conformation, unlike  
536 that of the flexible conformation AcGGM which has relatively infrequent Glc residues.  
537 The simulations also suggested galactosylation of the Man residue further promotes  
538 the formation of two-fold screw ribbon conformation (Berglund et al., 2019). Thus, it  
539 is likely that the backbone of  $\beta$ -GGM in solution maintains a flattened conformation  
540 that can interact with cellulose without adopting a new shape.

541 We speculate that  $\beta$ -GGM is likely to interact with cellulose similarly to XyG, but with  
542 a few notable differences. XyG, with its glucan backbone, is able to interact with  
543 cellulose fibrils. Unlike xylan, which possesses a face that might dock into fibrils and

544 hydrogen bond with the cellulose glucan chains (Busse-Wicher et al., 2016;  
545 Simmons et al., 2016; Grantham et al., 2017), XyG is thought to bind to the  
546 hydrophobic 100 or 200 cellulose fibril faces through stacking interactions and H-  
547 bonding, lying flat with substitutions placed on both sides of the two-fold screw  
548 backbone ribbon (Zhao et al., 2014; Benselfelt et al., 2016). Our earlier molecular  
549 dynamics simulations suggest  $\beta$ -GGM backbones, which contain alternating Man  
550 and Glc, could similarly bind to cellulose (Yu et al., 2018). Since the sugar backbone  
551 repeat is GM, in a two-fold screw ribbon each of the Man 2-OH that point out of the  
552 hexose ring plane could face away from the cellulose fibril. The  $\beta$ -GGM Glc residues  
553 would interact with cellulose as in the XyG backbone. The substitutions could  
554 additionally interact with the cellulose surface. However, since substitutions are only  
555 present on the alternating residues of Man in  $\beta$ -GGM, these will all lie on one side of  
556 the backbone ribbon, unlike XyG where substitutions will lie on both sides of the  
557 ribbon. This potentially provides somewhat different hemicellulose-cellulose  
558 interaction opportunities.

559 Studies of Arabidopsis seed mucilage give a hint that  $\beta$ -GGM does functionally  
560 interact with cellulose. Although the mucilage  $\beta$ -GGM differs in that it loses  $\beta$ -1,2-Gal  
561 at least in part through action of a cell wall  $\beta$ -galactosidase MUM2, the backbone  
562 and frequent  $\alpha$ -Gal substitution of Man residues are typical of  $\beta$ -GGM. In mucilage,  
563 this  $\beta$ -GGM is important for arrangement of the cellulose, because the *cs/a2* and  
564 *magt1* mutants no longer form the normal cellulose rays as in WT (Yu et al., 2014;  
565 Voiniciuc et al., 2015). Indications of  $\beta$ -GGM influencing cellulose arrangements also  
566 comes from staining of the cellulose in etiolated hypocotyls, since altered  
567 arrangements were seen in the mutants lacking both  $\beta$ -GGM and XyG.

568 The structural similarity of  $\beta$ -GGM and XyG led us to hypothesize that they may play  
569 connected functions in the cell wall during growth and development. Previously, our  
570 knowledge of glucomannan function from Arabidopsis molecular genetics indicated a  
571 role limited to seed mucilage and in embryogenesis (Goubet et al., 2003; Goubet et  
572 al., 2009; Yu et al., 2014; Voiniciuc et al., 2015; Yu et al., 2018; Somssich et al.,  
573 2021). Our results support the idea that XyG conceals the importance of  $\beta$ -GGM in  
574 many tissues. For example, the Arabidopsis *cs/a2*  $\beta$ -GGM mutant shows few  
575 phenotypes in the plant, but it does have altered adherent mucilage (Yu et al., 2018).  
576 Notably, in the mucilage XyG is undetectable (Haughn and Western, 2012). Studies

577 of the  $\beta$ -GGM and XyG backbone synthesis mutants also support a connection in  
578 function. The *csla2 xxt1 xxt2* mutant had more severe growth phenotypes than the  
579 *xxt1 xxt2* alone, again showing the role of  $\beta$ -GGM is partly obscured by XyG. We  
580 also showed that the loss of the  $\beta$ -GGM disaccharide side chain exacerbated the  
581 severity of XyG galactosylation mutant phenotypes, even though phenotypes were  
582 not observed in the presence of normal XyG.  $\beta$ -GGM and XyG are therefore  
583 connected in their functions, and they are both involved in cell expansion in various  
584 tissues. The relatively mild phenotypes of XyG mutants and  $\beta$ -GGM mutants is in  
585 part due to a level of functional redundancy of these hemicelluloses. It might be that  
586 loss of yet further hemicelluloses, including xylan, will reveal more severe impacts on  
587 wall function. The implication of our results is also that studies of XyG function have  
588 been hindered by the presence of  $\beta$ -GGM.  $\beta$ -GGM now needs to be studied  
589 alongside XyG in studies of hemicellulose function in plant cell expansion and  
590 development.

591

## 592 **Materials and Methods:**

### 593 **Plant Materials**

594 *Arabidopsis* (*Arabidopsis thaliana*) plants used in this work were from Col-0 ecotype.  
595 The various mutants are: *mbgt1-1* (SALK\_065561), *mbgt1-2* (SAIL\_852\_F05C),  
596 *csla2* (SALK\_065083), *csla9* (SALK\_071916), *magt1* (SALK\_061576), *xxt1*  
597 (SAIL\_785\_E02), *xxt2* (SALK\_101308), *mur3-1* (Reiter et al., 1997), *mur3-3*  
598 (SALK\_141953), *slt2* (GABI\_552C10), *fut1* (*mur2-1*) (Reiter et al., 1997), *irx9l*  
599 (SALK\_037323), *mum2-10* (SALK\_011436), *csla2 clsa9* (Goubet et al., 2009), and  
600 *xxt1 xxt2* (Cavalier et al., 2008). The *csla2 xxt1 xxt2* triple mutant was generated by  
601 crossing *csla2* and *xxt1 xxt2*, the *irx9l xxt1 xxt2* triple mutant was generated by  
602 crossing *irx9l* and *xxt1 xxt2*, the *mbgt1-1 mur3-1* double mutant was generated by  
603 crossing *mbgt1-1* and *mur3-1*, and the *mbgt1-1 mur3-3* double mutant was  
604 generated by crossing *mbgt1-1* and *mur3-3*. The homozygous lines were identified  
605 by PCR. The primers used for genotyping are shown in Supplemental Table S3.

### 606 **Plant Growth Conditions**

607 Plants were grown in controlled-environment chambers. Arabidopsis seeds were  
608 surface sterilized, sown on half Murashige and Skoog (MS) medium with 1%  
609 sucrose, stratified in darkness for 48 h at 4 °C, and then germinated at 21 °C under  
610 16-h light/8-h dark conditions. After 10 days, the seedlings were transferred to soil  
611 and grown in growth chambers under the same conditions. Arabidopsis liquid callus  
612 cultures were generated and maintained as described in (Prime et al., 2000).  
613 Uniformly labelled <sup>13</sup>C glucose was used in the medium to replace sucrose for  
614 ssNMR analysis.

615 *Nicotiana benthamiana* plants were grown at 21 °C under 16-h light/8-h dark  
616 conditions. Leaves of 4-week old *N. benthamiana* were used for infiltration.

617 Rosette leaves were harvested at 6 weeks, young stems at 30 days, siliques at 6  
618 weeks, and mature stems at 8 weeks. The plant height, the number of rosette  
619 branches, and the number of cauline branches were measured at 7 and 8 weeks. A  
620 rosette branch was defined as one originating from axils on the unexpanded stem,  
621 while the cauline branch was defined as one originated from the expanded segment  
622 of the inflorescence stem (Keller et al., 2006). All experiments were performed on at  
623 least three independently harvested sets of plant material.

#### 624 **Hypocotyl and Cell Measurements**

625 Seeds were surface-sterilized, sown on MS plates, and stored at 4°C for 3 days.  
626 Seeds were exposed to light for 6 h to stimulate germination, then wrapped in two  
627 layers of aluminium foil and grown for 2 to 7 days at 21 °C. Plates with etiolated  
628 seedlings were scanned using an HP Scanjet 8300 scanner at 600 dpi, and  
629 hypocotyl length was measured using ImageJ. To measure cell length, 4-d-old  
630 etiolated seedlings were firstly analysed with Cryo-SEM. Four-day-old etiolated  
631 hypocotyls were mounted onto carbon pad stubs, frozen and then coated with  
632 platinum and maintained at -145 °C as described previously (Lyczakowski et al.,  
633 2019). Images were acquired on a Zeiss EVO HD15 using a backscattered electron  
634 detector and an accelerating voltage of 25 kV with a working distance of >15 mm.  
635 Cell length measurements were taken for cells at the base of the hypocotyl using  
636 ImageJ software.

637 For generating the heat maps comparing cell length between *xxt1 xxt2* and *cs1a2*  
638 *xxt1 xxt2* mutants, four-day-old etiolated hypocotyls were submersed in 0.1 mg mL<sup>-1</sup>

639 propidium iodide for 3 minutes, washed briefly in water and then mounted in water  
640 on a microscope slide with a coverslip. The slide was mounted on an inverted Leica  
641 DMI8 SP8 confocal fitted with a 10x objective lens. Whole seedlings were imaged for  
642 fluorescence in 3D using the tile scan feature of the Leica LAS X Navigator software  
643 module and the tiles fused to generate a single z-stack file covering the whole  
644 hypocotyl region. The files were converted to tiff stacks and imported into  
645 MorphoGraphX (de Reuille et al., 2015). Voxels were averaged (XRad, YRad, ZRad  
646 = 2) and the following software tools implemented in this order: Edge detect  
647 (20,000), fill holes, closing, Marching cubes surface, located and deleted erroneous  
648 volumes manually, smooth mesh, subdivide, smooth mesh, project signal (5-10),  
649 Gaussian blur (2 px radius), draw seeds as long lines down the centre of each cell,  
650 watershed segmentation, corrected incorrect segmentations by drawing new seeds  
651 and resegmenting. An updated version of MorphoGraphX was obtained from Richard  
652 Smith (John Innes Centre, Norwich) which allows heat maps to be generated based  
653 on major axis length. These length heat maps were scaled from 0 to 200 micron  
654 range.

#### 655 **Cellulose fluorescent staining and imaging**

656 Four-day-old seedlings were stained according to the protocol described previously  
657 (Landrein et al., 2013). In our hands, cells in the upper portion of the hypocotyl  
658 stained uniformly while cells in the lower half did not. Expanded cells below the  
659 apical hook were therefore selected for imaging using an upright Leica SP8 confocal  
660 fitted with a 552 nm laser for excitation and 63x 1.4 NA oil immersion lens for  
661 imaging. Confocal optical sections were taken that covered the full depth of staining.  
662 Representative images in Figure 5 are taken from the middle of the upper cell wall  
663 surface with two consecutive sections averaged to aid observations of cellulose  
664 patterns. Orthogonal views were created by drawing line regions of interest along the  
665 length of the centre of cells using ImageJ and then using the reslice option.

#### 666 **Preparation of soluble hemicelluloses**

667 Dry and clean seeds were shaken in dH<sub>2</sub>O in a tube for 30 min at 30 Hz in a Retsch  
668 MM400 mill. The seed suspension was centrifuged at 1,000 rpm for 1 min. The  
669 supernatant was harvested and the seeds were washed twice with dH<sub>2</sub>O to get  
670 naked seeds. The mucilage supernatants were collected and used for mucilage  
671 analysis. Callus was harvested and washed with ddH<sub>2</sub>O to remove medium. Alcohol

672 Insoluble Residue (AIR) from stems, leaves, seed mucilage, naked seeds, siliques,  
673 callus and etiolated hypocotyls was prepared as previously described (Goubet et al.,  
674 2009; Yu et al., 2018). Thirty milligrams of AIR was treated with 2.5 mL of 4 M NaOH  
675 at room temperature (RT) for 1 h and centrifuged at 4000 rpm for 15 min. In order to  
676 neutralize the NaOH, prior to enzymatic digestion, the supernatants were loaded  
677 onto a PD-10 desalting column (GE Life-Science) and eluted with 50 mM ammonium  
678 acetate (pH 6.0) according to the manufacture instruction. The eluent contained the  
679 majority of the de-acetylated hemicelluloses and was aliquoted into tubes for 25  
680 mannan reactions digestions or 50 XyG reactions digestions.

### 681 **Enzyme Digestions**

682 For mannan analysis, the hemicelluloses eluted from PD-10 were digested with an  
683 excess of *Cellvibrio japonicus* Man26A (CjMan26A) mannanase (University of  
684 Newcastle) or *Aspergillus nidulans* GH5 (AnGH5) mannanase (Novozymes) in 50  
685 mM ammonium acetate (pH=6.0) at 37 °C overnight. Mannanases were de-activated  
686 after digestion with a heat treatment. Mannanase products were then digested  
687 overnight with *Aspergillus niger* GH35  $\beta$ -galactosidase (Megazyme) or *Cellvibrio*  
688 *mixtus* GH27  $\alpha$ -galactosidase (Prozomix) in 50 mM ammonium acetate (pH 6.0) at  
689 37 °C to remove the  $\beta$ -Gal or  $\alpha$ -Gal side chains. For sequential digestion, enzymes  
690 used were: *Aspergillus niger* GH3  $\beta$ -glucosidase (Novozymes), and *Cellvibrio mixtus*  
691 GH5  $\beta$ -mannosidase (University of Newcastle). The digestion conditions were 50  
692 mM ammonium acetate (pH 6.0) at 37 °C for 4 h with excess enzymes to complete  
693 digestion. After each reaction, samples were boiled at 100 °C for 10 min to denature  
694 the enzyme. Samples were then dried at 60 °C *in vacuo*.

695 For XyG analysis, the eluted hemicellulose fractions were digested with an excess of  
696 *Paenibacillus pabuli* XG5 (PpXG5) xyloglucanase (Novozymes) in 50 mM ammonium  
697 acetate (pH 6.0) at 37 °C for 18 h.

698 For xylan analysis, the eluted hemicellulose fractions were digested with an excess  
699 of *Neocallimastix patriciarum* GH11 (NpGH11) xylanase (Megazyme) as previously  
700 described (Mortimer et al., 2010).

### 701 **Monosaccharide Analysis of AIR by HPAEC-PAD**

702 Fifty micrograms of AIR was hydrolysed in 2 M TFA at 121 °C for 1 h, dried *in vacuo*  
703 and resuspended in H<sub>2</sub>O. Inositol was added as the internal standard.

704 Chromatography of the samples was performed using a CarboPac PA20 column as  
705 previously described. A standard mixture, containing 25  $\mu$ M of sugar standards (L-  
706 fucose, L-rhamnose, L-arabinose, D-galactose, D-glucose, D-xylose and D-  
707 mannose), was run before each batch of samples.

708

#### 709 **Oligosaccharide Fingerprint Analysis by PACE**

710 Samples and (Man)<sub>1-6</sub> standards (Megazyme) were derivatized with 8-  
711 aminonaphthalene-1,3,6-tresulphonic acid (ANTS; Invitrogen) as described previously  
712 (Goubet et al., 2002). After drying, the samples were re-suspended in 100  $\mu$ l of 3 M  
713 urea, of which 2  $\mu$ l was loaded onto the PACE gels. The samples were run and  
714 visualized using a G-box equipped with a trans-illuminator with long-wavelength light  
715 tubes (365 nm) and a short pass filter (500-600 nm) as described previously (Goubet  
716 et al., 2002). All analyses of oligosaccharides were repeated a minimum of three  
717 times.

#### 718 **Preparation of Oligosaccharides for MS**

719 Following the enzyme digestion, released peptides and enzymes were removed  
720 using reverse-phase Sep-Pak C18 cartridges (Waters) as previously described. The  
721 oligosaccharides were reductively aminated with 2-aminobenzamide (2-AB), using  
722 optimized labelling conditions. The labelled samples were then purified from  
723 reductive amination reagents using a GlycoClean S cartridge (Prozyme) as  
724 described previously (Tryfona et al., 2012).

#### 725 **Hydrophilic Interaction Liquid Chromatography (HILIC)-MALDI-ToF MS/MS**

726 Capillary HILIC was carried out using an LC-Packings Ultimate system (Dionex),  
727 using optimized elution conditions and robot harvest systems. After air drying, the  
728 sample spots were overlaid with 2,5-dihydroxybenzoic acid matrix and analysed by  
729 MALDI-ToF/ToF-MS/MS as described previously (Tryfona et al., 2012).

#### 730 **Separation of oligosaccharides by SEC**

731 Arabidopsis young stem AIR (500 mg), hydrolysed with an excess of enzymes (first  
732 C<sub>1</sub>Man26A, and then by a combination of  $\beta$ -glucosidase,  $\beta$ -mannosidase, and  $\alpha$ -  
733 galactosidase), was prepared as described above, and lyophilised. Samples were re-  
734 suspended in 2 ml dH<sub>2</sub>O, loaded onto a gravity-derived preparative Bio-Gel P2  
735 column (190  $\times$  2.5 cm; Bio-Rad), equilibrated and run in 20 mM ammonium acetate



736 pH 6.0. Fractions were collected and dried *in vacuo*. Fraction of interest was  
737 determined by PACE.

### 738 **Solution-state NMR**

739 Following SEC, lyophilised samples were re-suspended in D<sub>2</sub>O (700  $\mu$ L; 99.9%  
740 purity) and transferred to a 5 mm NMR tube. NMR spectra were recorded at 298 K  
741 with a Bruker AVANCE III spectrometer operating at 600 MHz equipped with a TCI  
742 CryoProbe. <sup>1</sup>H chemical-shift assignments were primarily obtained using <sup>1</sup>H–<sup>1</sup>H total  
743 correlation spectroscopy (TOCSY) and rotating frame Overhauser effect  
744 spectroscopy (ROESY). The H-1/H-2 peaks in a double quantum filtered correlation  
745 spectroscopy (DQFCOSY) were used to remove ambiguities in the assignments of  
746 H-2. <sup>13</sup>C assignments were obtained using <sup>13</sup>C HSQC and H2BC experiments  
747 (although the latter was incomplete due to the low concentration of the sample)  
748 (Cavanagh et al., 1995; Nyberg et al., 2005); the mixing times were 70 and 200  
749 msec for the TOCSY and ROESY experiments, respectively. Chemical shifts were  
750 measured relative to internal acetone ( $\delta(^1\text{H}) = 2.225$ ,  $\delta(^{13}\text{C}) = 31.07$  ppm). Data were  
751 processed using the Azara suite of programs and chemical-shift assignment was  
752 performed using CCPN Analysis v2.4 (Vranken et al., 2005).

### 753 **Protein expression and western blot analysis**

754 3×Myc tagged *MBGT* (At4g13990) and *PgGUX* coding sequences were PCR  
755 amplified from synthetic DNA (IDT) or previously described constructs (Lyczakowski  
756 et al., 2017) using primers described in Supplemental Table S3. Tobacco infiltration,  
757 microsome isolation and western blot analysis of membrane preparations were all  
758 performed as previously described (Lyczakowski et al., 2017).

### 759 **$\beta$ -Galactosyltransferase Activity Assay**

760 Adherent mucilage hemicelluloses from WT seeds, rich in  $\beta$ -GGM lacking the  $\beta$ -gal,  
761 were prepared as previously described (Yu et al., 2018). *mbgt-1* soluble  
762 hemicellulose from young stem was prepared as above. WT adherent mucilage  
763 hemicelluloses and *mbgt-1* young stem hemicelluloses aliquots were dried and used  
764 as acceptors for *in vitro*  $\beta$ -Gal transfer reaction. UDP-Gal (5 mM) was replaced with  
765 water in certain reactions to control for non-specific galactosylation. Reaction was  
766 performed for 5 hours at room temperature and was terminated by heating the  
767 samples at 100 °C for 10 mins. The polysaccharides were extracted using methanol

768 and chloroform as previously described (Lyczakowski et al., 2017). Extracted  
769 polysaccharides were digested with CjMan26A and analysed with PACE.

## 770 **Phylogeny**

771 The bulk of the GT47 Clade A sequences were downloaded as an orthologous  
772 cluster from the comparative genomics platform Plaza Dicots 4.5, Plaza Monocots  
773 4.5 (Van Bel et al., 2018), and Plaza Gymnosperms 3.0 (Proost et al., 2015), but  
774 were supplemented with the results of HMMER (<http://hmmer.org/>) and TBLASTN  
775 (Altschul et al., 1990; Altschul et al., 1997) searches of additional published  
776 genomes (Hori et al., 2014; Filiault et al., 2018; Li et al., 2018; Weston et al., 2018;  
777 Chen et al., 2019; Zhang et al., 2020) using an Arabidopsis GT47 Clade A HMM or  
778 the AtMUR3 protein sequence as a query, respectively. For the GT47-A tree,  
779 sequences were aligned with MAFFT (Kato et al., 2002; Kato and Standley, 2013)  
780 and truncated to their predicted GT47 domain (corresponding to residues 156–539 of  
781 AtMUR3) using a custom Python script (<https://www.python.org/>). Substantially  
782 truncated and very poorly aligned sequences were removed from the alignment  
783 manually. Prottest3 (Darriba et al., 2011) was used to determine an appropriate  
784 substitution model (LG), and the tree was built with FastTreeMP (Price et al., 2010)  
785 with 100 bootstraps. For the smaller MBGT homologue tree, a subset of sequences  
786 was selected from the relevant subclade of the larger tree and aligned using  
787 MUSCLE (Edgar, 2004). Prottest3 indicated JTT+I+G+F to be the best substitution  
788 model, and the tree was built accordingly using RAxML (Stamatakis, 2014) with 100  
789 rapid bootstraps; AtMUR3 was included to root the tree as well as supplementary  
790 MBGT homologues from the genomes of *Nicotiana tabacum* (Sierro et al., 2014) and  
791 *Rosa chinensis* (Raymond et al., 2018).

## 792 **Preparation of callus sample for ssNMR**

793 <sup>13</sup>C labelled callus was harvested and washed 6 times with unlabelled callus medium  
794 to remove the <sup>13</sup>C glucose. Then the callus was frozen in liquid N<sub>2</sub> and stored at -80  
795 °C overnight. Frozen callus was ground into powder in liquid N<sub>2</sub>, thawed on ice and  
796 centrifuged at 15,000 rpm at 4 °C, removing excess liquid, twice to obtain moist  
797 callus sample for ssNMR.

## 798 **Solid-state NMR**

799 Solid-state MAS NMR experiments were performed using Bruker (Karlsruhe,  
800 Germany) AVANCE NEO solid-state NMR spectrometers, operating at  $^1\text{H}$  and  $^{13}\text{C}$   
801 Larmor frequencies of 1000.4 MHz and 251.6 MHz and 850.2 and 213.8 MHz,  
802 respectively, with 3.2 mm double-resonance  $E^{\text{free}}$  MAS probes. Experiments were  
803 conducted at an indicated temperature of 283 K at an MAS frequency of 12.5 kHz on  
804 both spectrometers. The  $^{13}\text{C}$  chemical shift was determined using the carbonyl peak  
805 at 177.8 ppm of L-alanine as an external reference with respect to tetramethylsilane  
806 (TMS). Both  $^1\text{H}$ - $^{13}\text{C}$  cross-polarisation (CP), with ramped (70–100%)  $^1\text{H}$  rf amplitude  
807 and 1 ms contact time, and direct polarisation (DP) were used to obtain the initial  
808 transverse magnetisation (Metz et al., 1994). While CP emphasises the more rigid  
809 material a short, 2 s, recycle delay DP experiment was used to preferentially detect  
810 the mobile components. Two-dimensional double-quantum (DQ) correlation spectra  
811 were recorded using the refocused INADEQUATE pulse sequence which relies upon  
812 the use of isotropic, scalar J coupling to obtain through-bond information regarding  
813 directly coupled nuclei (Lesage et al., 1997; Lesage et al., 1999; Fayon et al., 2005).  
814 The carbon  $90^\circ$  and  $180^\circ$  pulse lengths were 3.5 – 4.3  $\mu\text{s}$  and 7.0 – 8.6  $\mu\text{s}$ ,  
815 respectively with  $2\tau$  spin-echo evolution times for a  $(\pi-\tau-\pi/2)$  spin-echo of 4.48 ms.  
816 SPINAL-64  $^1\text{H}$  decoupling was applied during both the evolution and signal  
817 acquisition periods at a  $^1\text{H}$  nutation frequency of 70–80 kHz (Fung et al., 2000). The  
818 acquisition time in the indirect dimension ( $t_1$ ) was 5.0 – 6.0 ms for the CP-  
819 INADEQUATE and 5.5 ms for the DP INADEQUATE experiment. The spectral width  
820 in the indirect dimension was 50 kHz for both with 192-416 acquisitions per  $t_1$  FID for  
821 the CP-INADEQUATE and 80 acquisitions for the DP INADEQUATE experiments.  
822 The States-TPPI method was used to achieve sign discrimination in  $F_1$ . The recycle  
823 delay was 2 s for both CP INADEQUATE and DP INADEQUATE experiments. The  
824 spectra were obtained by Fourier transformation into 4 K ( $F_2$ ) $\times$  2K ( $F_1$ ) points with  
825 exponential line broadening in  $F_2$  of 50 Hz for CP and 20 Hz for DP experiments  
826 respectively and squared sine bell processing in  $F_1$ . All spectra obtained were  
827 processed and analysed using Bruker Topspin version 3.6.2.

## 828 Accession Numbers

829 Sequence data from this article can be found in the Arabidopsis Genome Initiative or  
830 GenBank/EMBL databases under the following accession numbers: At4g13990  
831 (MBGT1), At5g22740 (CSLA2), At5g03760 (CSLA9), At2g22900 (MAGT1),

832 At3g62720 (XXT1), At4g02500 (XXT2), At1g27600 (IRX9L), At2g20370 (MUR3),  
833 At5g62220 (XLT2), At2g03220 (FUT1), and MUM2 (At5g63800).

### 834 **Author Contributions**

835 Author contributions: L.Y., and P.D. conceived and designed the study. L.Y.  
836 conducted most of the experiments and analysed the data. X.Y. made callus for  
837 ssNMR. R.C., R.D. and S.P.B. conducted the solid-state NMR experiments. ssNMR  
838 data were analysed by R.C., R.D., Y.Y., L.Y., and P.D.. J.J.L. made the constructs  
839 and contributed to the MBGT protein expression for *in vitro* assay. R.W. performed  
840 the microscopy. L.F.L.W. did the phylogenetic analysis and statistics. Y.Y. measured  
841 the plant growth phenotypes. K.I. performed some of the PACE analysis. X.Y. and  
842 J.W-R. performed the crosses of plants. K.S. performed the solution NMR and  
843 analysed the data. K.B.R.M.K. assisted with guidance on the use of glycoside  
844 hydrolase enzymes and S.C. tested the enzyme specificities. O.M.T. and H.T.  
845 contributed to the data interpretation and project discussion. L.Y., Y.Y., and P.D.  
846 wrote the manuscript. J.J.L., L.F.L.W., Y.Y., O.M.T., and K. I. assisted writing the  
847 manuscript. All authors commented on and approved the final manuscript.

848

### 849 **Acknowledgements**

850 We would like to acknowledge Prof. George Lomonosoff (John Innes Centre, UK),  
851 who developed the pEAQ-HyperTrans expression system used in this study. Plant  
852 Bioscience Limited supplied the pEAQ-HT vector that was used in this work. *AnGH5*  
853 mannanase, *AnGH3*  $\beta$ -glucosidase, and *PpXG5* xyloglucanase were kindly provided  
854 by Novozymes A/S, Denmark. *CjMan26A* mannanase and *CmGH5*  $\beta$ -mannosidase  
855 were kind gifts from Harry Gilbert (University of Newcastle).

856 The Microscopy Core Facility at the Sainsbury Laboratory (Cambridge University) is  
857 supported by the Gatsby Charitable Foundation.

858 The UK High-Field Solid-State NMR Facility used in this research was funded by  
859 EPSRC and BBSRC (EP/T015063/1 and EP/R029946/1), as well as the University of  
860 Warwick including via part funding through Birmingham Science City Advanced  
861 Materials Projects 1 and 2 supported by Advantage West Midlands (AWM) and the  
862 European Regional Development Fund (ERDF). We wish to thank the Facility

863 Manager Team (Dr Dinu Iuga and Dr Trent Franks, University of Warwick) for their  
864 help.

865 This work was supported by the Leverhulme Trust Centre for Natural Material  
866 Innovation and by Biotechnology and Biological Sciences Research Council  
867 (BBSRC) of the UK as part of the OpenPlant Synthetic Biology Research Centre  
868 (Reference BB/L014130/1), Cambridge BBSRC-DTP Programme (Reference  
869 BB/J014540/1), Broodbank Research Fellowship of University of Cambridge (no.  
870 PD16178) and a BBSRC iCASE studentship (Reference BB/M015432/1).

871

872 **Conflict of interest statement:** KBK is an employee of Novozymes, an  
873 enzyme company.

874

## 875 **Figure Legends**

876 **Figure 1. Two glucomannan types with distinct structures, synthesised by**  
877 **CSLA2 and CSLA9, are widely present in Arabidopsis PCW-rich tissues.**

878 Materials from five tissues, comprising etiolated seedling, young stem, seeds with  
879 mucilage removed (naked seed), leaves, and silique, were analysed by PACE.  
880 Hemicelluloses were extracted from Col-0, *csla2*, *csla9*, *csla2 csla9*, and *magt1* cell  
881 wall material using alkali before being hydrolysed with *endo*-mannanase *CjMan26A*.  
882 The products were subsequently derivatised with a fluorophore and separated by gel  
883 electrophoresis. The *csla2* mutant yielded oligosaccharides with a low degree of  
884 polymerization, whereas the WT and *csla9* mutant walls yielded longer  
885 oligosaccharides. The four main oligosaccharides (named S1–S4) are labelled with  
886 coloured arrows in samples from *csla9*. In leaves, the amount of S1–S4 was low,  
887 and they are missing in *magt1* mutants. M, Man; G, Glc; Manno-oligosaccharide  
888 standards M to M<sub>6</sub> are shown.

889 **Figure 2. Structural analysis of  $\beta$ -galactosylated glucomannan**  
890 **oligosaccharides from Arabidopsis young stem.** A, Characterization of  
891 glucomannan oligosaccharides released from WT, *csla2*, *csla9* and *magt1* cell walls  
892 by *CjMan26A*. Glucomannan from *csla2* is degraded into M, MM, GMM and  
893 oligosaccharides migrating near M<sub>4</sub>. Many WT and *csla9* glucomannan

894 oligosaccharides are resistant to  $\beta$ -glucosidase ( $\beta$ -Glc) and  $\beta$ -mannosidase ( $\beta$ -Man)  
895 enzyme digestions, whereas oligosaccharides from *cs/a2* are reduced to mono and  
896 disaccharides. B, Degradation of  $\beta$ -galactosylated glucomannan oligosaccharides  
897 from *cs/a9* young stem analysed by PACE.  $\beta$ -galactosidase ( $\beta$ -Gal),  $\alpha$ -galactosidase  
898 ( $\alpha$ -Gal),  $\beta$ -Glc, and  $\beta$ -Man enzymes were used sequentially. C, Products of  
899 *C*Man26A digestion of *cs/a9* cell walls were labelled with 2-AB and analysed by  
900 MALDI-TOF MS. The four main peaks correspond to the saccharides S1 to S4. D,  
901 S2 Hex6 in C was analysed by high-energy collision-induced dissociation (CID)  
902 MS/MS. The CID spectrum indicates that the  $\alpha$ -Gal residue is linked to C-6 of the  
903 third hexose from the reducing end and that the  $\beta$ -Gal residue is linked to the C-2 or  
904 C-3 of the  $\alpha$ -Gal. E, Nuclear magnetic resonance (NMR) analysis of S2. H-1 strip  
905 plots from 2D  $^1\text{H}$ - $^1\text{H}$  TOSCY (red), ROESY (blue), and DQFCOSY (green) spectra,  
906 showing the nuclear Overhauser effect (NOE) connectivity arising from the  $\beta$ -Gal $\rho$ -  
907 1,2- $\alpha$ -Gal $\rho$  linkage. F, A single-letter nomenclature for the identified  $\beta$ -GGM  
908 backbone and possible side chains. G, Characterization of *AnGH5*  $\beta$ -GGM  
909 glucomannan digestion products by PACE. *AnGH5* cleaves  $\beta$ -GGM from *cs/a9*  
910 young stem cell walls into GM, GA, GBGM, and GBGA oligosaccharides. H,  
911 Proportion of  $\beta$ -GGM disaccharides with different side chains from *AnGH5* digestion  
912 of etiolated *cs/a9* seedling glucomannan and PACE densitometry ( $n = 4$ ). Error bars  
913 show the SD. Manno-oligosaccharide standards M to M<sub>6</sub> are shown.

914 **Figure 3. AT4G13990 from CAZy GT47 Clade A encodes Arabidopsis mannan**  
915  **$\beta$ -galactosyltransferase 1 (MBGT1).** A,  $\beta$ -GGM and XyG share structural and  
916 biosynthesis similarities. These two polysaccharides exhibit analogous linkages in  
917 their backbones and corresponding side chain sugars. For position in the  
918 hemicellulose, the responsible glycosyltransferases are from the same CAZy family.  
919 B, AT4G13990/MBGT1 from GT47 Clade A is in a co-expression network with  
920 CSLA2 and other mannan-related genes. C, Gene model representing *MBGT1*. Red  
921 triangles represent the position of T-DNA insertions in mutant lines analysed in this  
922 study. Dark green represents the exon. Light green represents the UTR and blue  
923 shows an intron. D, Stem material of two insertional mutants of the *MBGT1* gene  
924 was analysed by PACE by *C*Man26A. No  $\beta$ -galactosylated oligosaccharide was  
925 detected in either *mbgt1* mutant. E, Western blot of 3 $\times$ Myc-tagged recombinant  
926 proteins expressed in *N. benthamiana*. The expected mass of 3 $\times$ Myc-MBGT1 is

927 64.86 kDa. The expected mass of the control enzyme 3×Myc–PgGUX is 78.18 kDa.  
928 Both proteins form stable dimers. F, *In vitro* activity of the recombinant MBGT1  
929 protein. In the left panel, *mbgt1-1* young stem (YS) glucomannan was used as an  
930 acceptor for MBGT1-mediated galactosylation, whereas in the right panel, WT  
931 adherent mucilage glucomannan was used. The products were analysed with PACE  
932 using digestion with C<sub>7</sub>Man26A. Arrows indicate band shifts after each reaction.  
933 Manno-oligosaccharide standards M to M<sub>6</sub> are shown.

934 **Figure 4. Un-rooted phylogenetic tree of CAZy GT47 Clade A.** Sequences from  
935 the genomes of 96 streptophytes (Supplementary Table 2) were used to construct a  
936 comprehensive phylogeny of GT47 Clade A. Most sequences were downloaded from  
937 PLAZA (<https://bioinformatics.psb.ugent.be/plaza/>), but were supplemented with  
938 additional sequences from further genomes, derived from HMMER and TBLASTN  
939 searches. The basal streptophyte representative is *Klebsormidium nitens*, and the  
940 Lycopodiophyte representative is *Selaginella moellendorffii*. Sequences were aligned  
941 with MAFFT and truncated to leave only the predicted GT47 domain. The phylogeny  
942 was then inferred using FastTree, with 100 bootstrap pseudo-replicates. Percentage  
943 replication is indicated for important splits. The resultant tree revealed the existence  
944 of seven main subgroups within GT47-A (groups I–VII), four of which contain known  
945 XyG glycosyltransferases. The group containing MBGT was designated group VII.  
946 The activities of characterised enzymes are illustrated in SNFG format.

947 **Figure 5. The importance of β-galactosylation of β-GGM is revealed in the XyG**  
948 **β-galactosylation mutant *mur3*.** A, Four-week-old rosettes of *mur3-3* T-DNA  
949 insertion mutant and *mbgt1-1 mur3-3* double mutant. B, Four-week-old rosettes of  
950 *mur3-1* point mutant and *mbgt1-1 mur3-1* double mutant. C, Six-week-old plants,  
951 showing dwarfing of the *mur3* and *mbgt1-1 mur3* double mutants. D, E Quantification  
952 of the number of rosette branches (D) and cauline branches (E) for 7 and 8-week-old  
953 *mur3-1* and *mbgt1-1 mur3-1* plants. *mbgt1-1 mur3-1* mutants show no significant  
954 change in rosette branches, but a significant increase in cauline branches compared  
955 to *mur3-1*. Data were modelled by Poisson regression; a likelihood ratio test  
956 indicated a significant contribution of genotype in determining the number of stems  
957 (Rosette branches 7 weeks:  $n = 75$ ,  $G^2_3 = 26.2$ ,  $p = 8.6 \times 10^{-6}$ ; 8 weeks:  $n = 74$ ,  $G^2_3$   
958  $= 16.6$ ,  $p = 8.4 \times 10^{-4}$ ). Cauline branches 7 weeks:  $n = 75$ ,  $G^2_3 = 109$ ,  $p < 2.2 \times$

959  $10^{-16}$ ; 8 weeks:  $n = 73$ ,  $G^2_3 = 144$ ,  $p = 1.5 \times 10^{-24}$ ). Results of post-hoc pairwise  
960 comparisons (within each time point) are indicated by compact letter display (letter  
961 sharing indicates lack of significant difference *i.e.* where  $p > 0.05$ ). Data were  
962 modelled by Poisson regression; a likelihood ratio test indicated a significant  
963 contribution of genotype in determining the number of stems (Rosette branches 7  
964 weeks:  $n = 75$ ,  $G^2_3 = 26.2$ ,  $p = 8.6 \times 10^{-6}$ ; 8 weeks:  $n = 74$ ,  $G^2_3 = 16.6$ ,  $p = 8.4 \times$   
965  $10^{-4}$ ). Cauline branches 7 weeks:  $n = 75$ ,  $G^2_3 = 109$ ,  $p < 2.2 \times 10^{-16}$ ; 8 weeks:  $n =$   
966  $73$ ,  $G^2_3 = 144$ ,  $p = 1.5 \times 10^{-24}$ ). Error bars represent standard error of the mean. F,  
967 Quantification of plant height for 7 and 8-week-old plants. One-way ANOVA  
968 indicated a significant contribution of genotype in determining plant height at both  
969 timepoints (7 weeks:  $n = 208$ ,  $F_{5,202} = 1257$ ,  $p < 2 \times 10^{-16}$ ; 8 weeks:  $n = 200$ ,  $F_{5,194} =$   
970  $760$ ,  $p < 2 \times 10^{-16}$ ). Results of post-hoc pairwise comparisons (within each time  
971 point) are indicated by compact letter display. Apart from the significant difference  
972 between WT and *mbgt1-1* at 7 weeks, where  $p = 0.0066$ ,  $p < 1 \times 10^{-6}$  for all  
973 significant differences. Error bars represent standard deviation. WAS, week after  
974 sowing. Scale bars = 9 cm.

975 **Figure 6.  $\beta$ -GGM function in primary cell walls is revealed when the XyG is**  
976 **missing.** A, Four-week-old rosettes. Scale bar = 9 cm. B, Six-week-old plants.  
977 Scale bar = 9 cm. C, Quantification of plant height for 6, 7, and 8-week-old plants.  
978 One-way ANOVA indicated a significant contribution of genotype in determining plant  
979 height at all three timepoints (6 weeks:  $n = 131$ ,  $F_{3,127} = 65.0$ ,  $p < 2 \times 10^{-16}$ ; 7 weeks:  
980  $n = 136$ ,  $F_{3,132} = 88.2$ ,  $p < 2 \times 10^{-16}$ ; 8 weeks:  $n = 131$ ,  $F_{3,127} = 35.8$ ,  $p < 2 \times 10^{-16}$ ).  
981 Results of post-hoc pairwise comparisons (Tukey's honest significant difference) are  
982 indicated by compact letter display. For all significant differences,  $p < 0.001$  apart  
983 from WT-*cls2* at week 7 ( $p = 0.0063$ ) and *cls2-xxt1 xxt2* at week 8 ( $p = 0.0026$ ).  
984 D, Siliques from 7-week-old plants. Scale bar = 2 cm. E, Violin plot of silique length.  
985 Siliques from more than three plants were measured for each genotype. Black  
986 circles indicate individual measurements; white lines represent the group mean, and  
987 error bars indicate standard deviation. One-way ANOVA indicated a significant  
988 contribution of genotype in determining plant height at all three time points ( $n = 89$ ,  
989  $F_{3,85} = 553$ ,  $p < 2 \times 10^{-16}$ ). Results of post-hoc pairwise comparisons (Tukey's honest  
990 significant difference; WT,  $n = 22$ ; *cls2*,  $n = 25$ ; *xxt1 xxt2*,  $n = 23$ ; *cls2 xxt1 xxt2*,  $n$   
991  $= 19$ ) are indicated with asterisks.



992 **Figure 7. A role of  $\beta$ -GGM in cell expansion and cellulose organisation.** A, Six-  
993 day-old hypocotyls grown on MS medium with sucrose. Scale bar = 1 cm. B,  
994 Quantification of hypocotyl length for 3- to 6-day-old seedlings ( $n \geq 40$  seedlings for  
995 each point per genotype). DAS, days after sowing. Error bars represent standard  
996 deviation. Although one-way ANOVA indicated no significant difference between  
997 genotypes at 4 days ( $n = 213$ ,  $F_{3,209} = 2.58$ ,  $p = 0.054$ ), a significant difference was  
998 seen at 3 days, 5 days and after (3 days:  $n = 197$ ,  $F_{3,193} = 40.7$ ,  $p < 2 \times 10^{-16}$ ; 5 days:  
999  $n = 276$ ,  $F_{3,272} = 82.8$ ,  $p < 2 \times 10^{-16}$ ; 6 days:  $n = 271$ ,  $F_{3,267} = 177$ ,  $p < 2 \times 10^{-16}$ ; 7  
1000 days:  $n = 245$ ,  $F_{3,241} = 167$ ,  $p < 2 \times 10^{-16}$ ). Results of post-hoc pairwise comparisons  
1001 (Tukey's honest significant difference) are indicated by compact letter display. C,  
1002 Cryo-SEM analysis of 4-day-old etiolated hypocotyls from WT and mutant plants.  
1003 Individual cells in the tissue are outlined. Cells are shorter in the *csla2 xxt1 xxt2* triple  
1004 mutant than in the *xxt1 xxt2* double mutant. Scale Bar = 100  $\mu\text{m}$ . D, Quantification of  
1005 cell length of 4-day-old hypocotyls. Black circles indicate individual measurements;  
1006 white lines represent the group mean One-way ANOVA indicated a significant  
1007 contribution of genotype in determining hypocotyl cell length ( $n = 413$ ,  $F_{3,409} = 40.44$ ,  
1008  $p < 2 \times 10^{-16}$ ). Results of post-hoc pairwise comparisons (Tukey's honest significant  
1009 difference) are indicated by asterisks (\*  $p < 0.05$ , \*\*  $p < 0.01$ , \*\*\*  $p < 0.001$ ). E,  
1010 Heatmap showing 4-day-old hypocotyl cell length. Scale Bar = 500  $\mu\text{m}$ . F, G Four-  
1011 day-old hypocotyls were stained with Pontamine S4B and then observed under a  
1012 confocal microscope. Representative image of hypocotyl primary cell wall (F). A  
1013 survey of orthogonal views showing the profile of the hypocotyl primary cell wall (G).  
1014 Scale bars = 10  $\mu\text{m}$ .

1015 **Figure 8.  $^{13}\text{C}$  CP- and DP- refocused INADEQUATE MAS solid-state NMR**  
1016 **spectra show the  $\beta$ -GGM peaks in *irx9l xxt1 xxt2* callus.** The  $\beta$ -GGM peaks are  
1017 labelled: mannose (M) and  $\alpha$ -Gal. Also labelled are the main cellulose peaks  
1018 (domain 1,  $\text{C}^1$ ; domain 2,  $\text{C}^2$ ), galacturonic acid (GalA) of pectin, and a terminal  
1019 xylose (X) linked to an unknown polymer. A terminal arabinose ( $\text{A}^t$ ) and another  
1020 arabinose ( $\text{A}^c$ ) are also labelled. The inset shows an overlay of the CP (blue) and DP  
1021 (red) INADEQUATE spectra for the M5, M6 region. It is clear that M5 and M6 are not  
1022 visible in the DP spectrum, i.e. are not mobile. Spectra were acquired at a  $^{13}\text{C}$   
1023 Larmor frequency of 251.6 MHz and a MAS frequency of 12.5 kHz. The spin-echo  
1024 duration used was 2.24 ms.

1025 **Supplemental material Legends**

1026 **Supplemental Figure S1. Schematic structures of primary cell wall**  
1027 **hemicellulose.**

1028 **Supplemental Figure S2. PACE gels of control samples of un-digested material**  
1029 **and enzymes.** A, un-digested control of etiolated seedling and naked seed samples.  
1030 B, un-digested control of young stem samples. C, un-digested control of young stem  
1031 samples of XyG related mutants. D, Background bands brought by enzymes used in  
1032 this work, supporting that all PACE results were not contamination from enzymes  
1033 themselves. Markers M to M<sub>6</sub> are shown.

1034 **Supplemental Figure S3. Structural analysis of  $\alpha$ -galactosylated mannan**  
1035 **oligosaccharides from *csla9* young stem.** A, Analysis of  $\alpha$ -galactosylated mannan  
1036 by PACE. *csla9* young stem was digested with CjMan26A first and the resultant  
1037 oligosaccharides were digested sequentially with  $\alpha$ -galactosidase ( $\alpha$ -Gal),  $\beta$ -  
1038 glucosidase ( $\beta$ -Glc), and  $\beta$ -mannosidase ( $\beta$ -Man) enzymes.  $\alpha$ -Galactosylated  
1039 mannan oligosaccharides have Glc-Man repeating units. Markers M to M<sub>6</sub> are  
1040 shown. B, Hex5 (S1) in Figure 2B was analysed by high-energy CID MS/MS. The  
1041 first Man at the non-reducing end is decorated with a single  $\alpha$ -1,6-Gal.

1042 **Supplemental Figure S4. Patterned  $\beta$ -GGM is widely present in eudicots.** A to  
1043 C, Mannan from tomato fruit, kiwi fruit, and apple fruit was analysed. AnGH5  
1044 products of AIR were digested with  $\beta$ -galactosidase ( $\beta$ -Gal) to test the presence of  $\beta$ -  
1045 GGM. NC indicates a negative control without enzyme. D, Arabidopsis seed  
1046 mucilage from WT and *mum2* was digested with CjMan26A.  $\beta$ -GGM was detected in  
1047 *mum2* mucilage. M, Man; G, Glc; Markers M to M<sub>6</sub> are shown.

1048 **Supplemental Figure S5. Loss of XyG does not affect the production of CSLA2**  
1049  **$\beta$ -GGM, or vice versa.** Five-week-old young stem was used for the following  
1050 digestion. A, Assignment of PpXG5 products of XyG digestion with PACE. The  
1051 assignment is enabled by XyG-related mutants. B, Structure of XyG and  $\beta$ -GGM in  
1052 *mur3-3* or *mbgt1-1* mutants. C, Structure of XyG and  $\beta$ -GGM in *xxt1 xxt2* and *csla2*  
1053 mutants. Bands in red dashed lines are XyG oligosaccharide dimers. M: Man; G:  
1054 Glc. Markers M to M<sub>6</sub> are shown.

1055 **Supplemental Figure S6. Arabidopsis callus hemicelluloses analyzed by PACE.**

1056 A, Callus mannan was analysed by both *CjMan26A* and *AnGH5* mannanases. *csla2*-  
1057 related mutants lack mannan accessed by *CjMan26A* and *AnGH5*. B, Callus XyG  
1058 was analysed by *PpXG5*. C, Callus xylan was analyzed by *NpGH11*. *irx9l*-related  
1059 mutants lack xylan accessed by *NpGH11*. Bands in red dashed lines are XyG  
1060 oligosaccharide dimers. M: Man; X: Xyl. Markers M to M<sub>6</sub> and X to X<sub>6</sub> are shown.

1061 **Supplemental Figure S7. Solid-state NMR of WT Arabidopsis callus.** The

1062 carbohydrate region of a refocussed CP-INADEQUATE <sup>13</sup>C MAS NMR spectrum of  
1063 <sup>13</sup>C enriched WT callus with the β-GGM Man peaks M5 and M6 labelled. Xyloglucan  
1064 is also labelled as well as carbons in the major polysaccharides: galacturonic acid  
1065 (GalA), terminal Xyl (X) and α-Gal and two arabinoses (A<sup>t</sup> and A<sup>c</sup>). The terminal  
1066 arabinose is labelled t and the other arabinose c. For cellulose, the environments  
1067 have been split into two groups, domain 1 and 2 cellulose (C<sup>1</sup> and C<sup>2</sup>). For  
1068 xyloglucan, 5 sets of environments are seen depending on the substitution, labelled  
1069 as unsubstituted backbone Glc (XyC<sup>u</sup>), substituted backbone Glc (XyC<sup>s</sup>), terminal  
1070 Xyl on XyG (XgX<sup>t</sup>), substituted Xyl (XgX<sup>s</sup>), and Fuc (F). Assignments are listed in  
1071 Supplementary Table 1. The inset shows an overlay for the M5, M6 region of a CP  
1072 INADEQUATE spectrum of <sup>13</sup>C enriched *irx9l xxt1 xxt2* callus (blue) with that of *csla2*  
1073 *xxt1 xxt2* callus. As expected, the β-GGM (M and α-Gal) peaks are missing from the  
1074 *csla2 xxt1 xxt2* spectrum. Spectra were acquired at a <sup>13</sup>C Larmor frequency of 213.8  
1075 MHz for WT callus and *csla2 xxt1 xxt2* and 251.6 MHz for *irx9l xxt1 xxt2*. The MAS  
1076 frequency was 12.5 kHz and the spin-echo duration was 2.24 ms.

1077 **Supplemental Table 1.** <sup>1</sup>H and <sup>13</sup>C NMR chemical shifts for the GGM  
1078 oligosaccharide in solution and the solid-state NMR assignments of β-GGM.

1079 **Supplemental Table 2.** Plant species used for the phylogenetic tree.

1080 **Supplemental Table 3.** Primers used in this study.

1081

1082

## Parsed Citations

- Altschul, S.F., Gish, W., Miller, W., Myers, E.W., and Lipman, D.J. (1990).** Basic local alignment search tool. *J Mol Biol* 215, 403-410.  
Google Scholar: [Author Only](#) [Title Only](#) [Author and Title](#)
- Altschul, S.F., Madden, T.L., Schaffer, A.A., Zhang, J., Zhang, Z., Miller, W., and Lipman, D.J. (1997).** Gapped BLAST and PSI-BLAST: a new generation of protein database search programs. *Nucleic Acids Res* 25, 3389-3402.  
Google Scholar: [Author Only](#) [Title Only](#) [Author and Title](#)
- Arnling Bååth, J., Martinez-Abad, A., Berglund, J., Larsbrink, J., Vilaplana, F., and Olsson, L. (2018).** Mannanase hydrolysis of spruce galactoglucomannan focusing on the influence of acetylation on enzymatic mannan degradation. *Biotechnol Biofuels* 11, 114.  
Google Scholar: [Author Only](#) [Title Only](#) [Author and Title](#)
- Aryal, B., Jonsson, K., Baral, A., Sancho-Andres, G., Routier-Kierzkowska, A.L., Kierzkowski, D., and Bhalerao, R.P. (2020).** Interplay between Cell Wall and Auxin Mediates the Control of Differential Cell Elongation during Apical Hook Development. *Curr Biol* 30, 1733-1739.  
Google Scholar: [Author Only](#) [Title Only](#) [Author and Title](#)
- Benselfelt, T., Cranston, E.D., Ondaral, S., Johansson, E., Brumer, H., Rutland, M.W., and Wågberg, L. (2016).** Adsorption of xyloglucan onto cellulose surfaces of different morphologies: an entropy-driven process. *Biomacromolecules* 17, 2801-2811.  
Google Scholar: [Author Only](#) [Title Only](#) [Author and Title](#)
- Berglund, J., Azhar, S., Lawoko, M., Lindström, M., Vilaplana, F., Wohlert, J., and Henriksson, G. (2019).** The structure of galactoglucomannan impacts the degradation under alkaline conditions. *Cellulose* 26, 2155-2175.  
Google Scholar: [Author Only](#) [Title Only](#) [Author and Title](#)
- Berglund, J., Angles d'Ortoli, T., Vilaplana, F., Widmalm, G., Bergenstråhle-Wohlert, M., Lawoko, M., Henriksson, G., Lindström, M., and Wohlert, J. (2016).** A molecular dynamics study of the effect of glycosidic linkage type in the hemicellulose backbone on the molecular chain flexibility. *Plant J* 88, 56-70.  
Google Scholar: [Author Only](#) [Title Only](#) [Author and Title](#)
- Bootten, T.J., Harris, P.J., Melton, L.D., and Newman, R.H. (2004).** Solid-state <sup>13</sup>C-NMR spectroscopy shows that the xyloglucans in the primary cell walls of mung bean (*Vigna radiata* L.) occur in different domains: a new model for xyloglucan-cellulose interactions in the cell wall. *J Exp Bot* 55, 571-583.  
Google Scholar: [Author Only](#) [Title Only](#) [Author and Title](#)
- Burton, R.A., Gidley, M.J., and Fincher, G.B. (2010).** Heterogeneity in the chemistry, structure and function of plant cell walls. *Nat Chem Biol* 6, 724-732.  
Google Scholar: [Author Only](#) [Title Only](#) [Author and Title](#)
- Busse-Wicher, M., Grantham, N.J., Lyczakowski, J.J., Nikolovski, N., and Dupree, P. (2016).** Xylan decoration patterns and the plant secondary cell wall molecular architecture. *Biochem Soc T* 44, 74-78.  
Google Scholar: [Author Only](#) [Title Only](#) [Author and Title](#)
- Cavalier, D.M., Lerouxel, O., Neumetzler, L., Yamauchi, K., Reinecke, A., Freshour, G., Zobotina, O.A., Hahn, M.G., Burgert, I., Pauly, M., Raikhel, N.V., and Keegstra, K. (2008).** Disrupting two *Arabidopsis thaliana* xylosyltransferase genes results in plants deficient in xyloglucan, a major primary cell wall component. *Plant Cell* 20, 1519-1537.  
Google Scholar: [Author Only](#) [Title Only](#) [Author and Title](#)
- Cavanagh, J., Fairbrother, W.J., Palmer III, A.G., and Skelton, N.J. (1995).** Protein NMR spectroscopy: principles and practice. (Elsevier).  
Google Scholar: [Author Only](#) [Title Only](#) [Author and Title](#)
- Chen, J.H., Hao, Z.D., Guang, X.M., Zhao, C.X., Wang, P.K., Xue, L.J., Zhu, Q.H., Yang, L.F., Sheng, Y., Zhou, Y.W., Xu, H.B., Xie, H.Q., Long, X.F., Zhang, J., Wang, Z.R., Shi, M.M., Lu, Y., Liu, S.Q., Guan, L.H., Zhu, Q.H., Yang, L.M., Ge, S., Cheng, T.L., Laux, T., Gao, Q., Peng, Y., Liu, N., Yang, S.H., and Shi, J.S. (2019).** Liriodendron genome sheds light on angiosperm phylogeny and species-pair differentiation. *Nat Plants* 5, 18-25.  
Google Scholar: [Author Only](#) [Title Only](#) [Author and Title](#)
- Cocuron, J.C., Lerouxel, O., Drakakaki, G., Alonso, A.P., Liepman, A.H., Keegstra, K., Raikhel, N., and Wilkerson, C.G. (2007).** A gene from the cellulose synthase-like C family encodes a  $\beta$ -1,4 glucan synthase. *Proc Natl Acad Sci USA* 104, 8550-8555.  
Google Scholar: [Author Only](#) [Title Only](#) [Author and Title](#)
- Cosgrove, D.J. (2014).** Re-constructing our models of cellulose and primary cell wall assembly. *Curr Opin Plant Biol* 22, 122-131.  
Google Scholar: [Author Only](#) [Title Only](#) [Author and Title](#)
- Cosgrove, D.J. (2018).** Nanoscale structure, mechanics and growth of epidermal cell walls. *Curr Opin Plant Biol* 46, 77-86.  
Google Scholar: [Author Only](#) [Title Only](#) [Author and Title](#)

Cresswell, R., Dupree, R., Brown, S.P., Pereira, C.S., Skaf, M.S., Sorieul, M., Dupree, P., and Hill, S. (2021). Importance of Water in Maintaining Softwood Secondary Cell Wall Nanostructure. *Biomacromolecules* 22, 4669-4680.

Google Scholar: [Author Only](#) [Title Only](#) [Author and Title](#)

Darriba, D., Taboada, G.L., Doallo, R., and Posada, D. (2011). ProtTest 3: fast selection of best-fit models of protein evolution. *Bioinformatics* 27, 1164-1165.

Google Scholar: [Author Only](#) [Title Only](#) [Author and Title](#)

de Reuille, P.B., Routier-Kierzkowska, A.-L., Kierzkowski, D., Bassel, G.W., Schüpbach, T., Tauriello, G., Bajpai, N., Strauss, S., Weber, A., and Kiss, A. (2015). MorphoGraphX: A platform for quantifying morphogenesis in 4D. *Elife* 4, e05864.

Google Scholar: [Author Only](#) [Title Only](#) [Author and Title](#)

Dean, G.H., Zheng, H., Tewari, J., Huang, J., Young, D.S., Hwang, Y.T., Western, T.L., Carpita, N.C., McCann, M.C., Mansfield, S.D., and Haughn, G.W. (2007). The Arabidopsis MUM2 gene encodes a  $\beta$ -galactosidase required for the production of seed coat mucilage with correct hydration properties. *Plant Cell* 19, 4007-4021.

Google Scholar: [Author Only](#) [Title Only](#) [Author and Title](#)

Edgar, R.C. (2004). MUSCLE: multiple sequence alignment with high accuracy and high throughput. *Nucleic Acids Res* 32, 1792-1797.

Google Scholar: [Author Only](#) [Title Only](#) [Author and Title](#)

Fayon, F., Massiot, D., Levitt, M.H., Titman, J.J., Gregory, D.H., Duma, L., Emsley, L., and Brown, S.P. (2005). Through-space contributions to two-dimensional double-quantum J correlation NMR spectra of magic-angle-spinning solids. *J Chem Phys* 122, 194313.

Google Scholar: [Author Only](#) [Title Only](#) [Author and Title](#)

Filiault, D.L., Ballerini, E.S., Mandáková, T., Aköz, G., Derieg, N.J., Schmutz, J., Jenkins, J., Grimwood, J., Shu, S.Q., Hayes, R.D., Hellsten, U., Barry, K., Yan, J.Y., Mihaltcheva, S., Karafiátová, M., Nizhynska, V., Kramer, E.M., Lysak, M.A., Hodges, S.A., and Nordborg, M. (2018). The *Aquilegia* genome provides insight into adaptive radiation and reveals an extraordinarily polymorphic chromosome with a unique history. *Elife* 7.

Google Scholar: [Author Only](#) [Title Only](#) [Author and Title](#)

Fry, S.C., York, W.S., Albersheim, P., Darvill, A., Hayashi, T., Joseleau, J.P., Kato, Y., Lorences, E.P., Maclachlan, G.A., Mcneil, M., Mort, A.J., Reid, J.S.G., Seitz, H.U., Selvendran, R.R., Voragen, A.G.J., and White, A.R. (1993). An unambiguous nomenclature for xyloglucan-derived oligosaccharides. *Physiol Plant* 89, 1-3.

Google Scholar: [Author Only](#) [Title Only](#) [Author and Title](#)

Fung, B., Khitritin, A., and Ermolaev, K. (2000). An improved broadband decoupling sequence for liquid crystals and solids. *J Magn Reson* 142, 97-101.

Google Scholar: [Author Only](#) [Title Only](#) [Author and Title](#)

Geddes, D., and Wilkie, K. (1972). A galactoglucomannan from the stem tissues of the aquatic moss *Fontinalis antipyretica*. *Carbohydr Res* 23, 349-357.

Google Scholar: [Author Only](#) [Title Only](#) [Author and Title](#)

Geshi, N., Harholt, J., Sakuragi, Y., Jensen, J.K., and Scheller, H.V. (2018). Glycosyltransferases of the GT 47 family. *Annu Plant Rev*, 265-283.

Google Scholar: [Author Only](#) [Title Only](#) [Author and Title](#)

Gilbert, H.J. (2010). The biochemistry and structural biology of plant cell wall deconstruction. *Plant Physiol* 153, 444-455.

Google Scholar: [Author Only](#) [Title Only](#) [Author and Title](#)

Goubet, F., Jackson, P., Deery, M.J., and Dupree, P. (2002). Polysaccharide analysis using carbohydrate gel electrophoresis: A method to study plant cell wall polysaccharides and polysaccharide hydrolases. *Anal Biochem* 300, 53-68.

Google Scholar: [Author Only](#) [Title Only](#) [Author and Title](#)

Goubet, F., Misrahi, A., Park, S.K., Zhang, Z.N., Twell, D., and Dupree, P. (2003). AtCSLA7, a cellulose synthase-like putative glycosyltransferase, is important for pollen tube growth and embryogenesis in *Arabidopsis*. *Plant Physiol* 131, 547-557.

Google Scholar: [Author Only](#) [Title Only](#) [Author and Title](#)

Goubet, F., Barton, C.J., Mortimer, J.C., Yu, X.L., Zhang, Z.N., Miles, G.P., Richens, J., Liepman, A.H., Seffen, K., and Dupree, P. (2009). Cell wall glucomannan in *Arabidopsis* is synthesised by CSLA glycosyltransferases, and influences the progression of embryogenesis. *Plant J* 60, 527-538.

Google Scholar: [Author Only](#) [Title Only](#) [Author and Title](#)

Grantham, N.J., Wurman-Rodrich, J., Terrett, O.M., Lyczakowski, J.J., Stott, K., Iuga, D., Simmons, T.J., Durand-Tardif, M., Brown, S.P., Dupree, R., Busse-Wicher, M., and Dupree, P. (2017). An even pattern of xylan substitution is critical for interaction with cellulose in plant cell walls. *Nat Plants* 3, 859-865.

Google Scholar: [Author Only](#) [Title Only](#) [Author and Title](#)

Han, M., Liu, Y., Zhang, F., Sun, D., and Jiang, J. (2020). Effect of galactose side-chain on the self-assembly of xyloglucan macromolecule. *Carbohydr Polym* 246, 116577.

Google Scholar: [Author Only](#) [Title Only](#) [Author and Title](#)

Haughn, G.W., and Western, T.L. (2012). Arabidopsis Seed Coat Mucilage is a Specialized Cell Wall that Can be Used as a Model for Genetic Analysis of Plant Cell Wall Structure and Function. *Front Plant Sci* 3, 64.

Google Scholar: [Author Only](#) [Title Only](#) [Author and Title](#)

Hori, K., Maruyama, F., Fujisawa, T., Togashi, T., Yamamoto, N., Seo, M., Sato, S., Yamada, T., Mori, H., Tajima, N., Moriyama, T., Ikeuchi, M., Watanabe, M., Wada, H., Kobayashi, K., Saito, M., Masuda, T., Sasaki-Sekimoto, Y., Mashiguchi, K., Awai, K., Shimojima, M., Masuda, S., Iwai, M., Nobusawa, T., Narise, T., Kondo, S., Saito, H., Sato, R., Murakawa, M., Ihara, Y., Oshima-Yamada, Y., Ohtaka, K., Satoh, M., Sonobe, K., Ishii, M., Ohtani, R., Kanamori-Sato, M., Honoki, R., Miyazaki, D., Mochizuki, H., Umetsu, J., Higashi, K., Shibata, D., Kamiya, Y., Sato, N., Nakamura, Y., Tabata, S., Ida, S., Kurokawa, K., and Ohta, H. (2014). Klebsormidium flaccidum genome reveals primary factors for plant terrestrial adaptation. *Nat Commun* 5, 3978.

Google Scholar: [Author Only](#) [Title Only](#) [Author and Title](#)

Ishida, K., and Yokoyama, R. (2022). Reconsidering the function of the xyloglucan endotransglucosylase/hydrolase family. *J Plant Res* 135, 145-156.

Google Scholar: [Author Only](#) [Title Only](#) [Author and Title](#)

Jensen, J.K., Schultink, A., Keegstra, K., Wilkerson, C.G., and Pauly, M. (2012). RNA-Seq analysis of developing nasturtium seeds (*Tropaeolum majus*): identification and characterization of an additional galactosyltransferase involved in xyloglucan biosynthesis. *Mol Plant* 5, 984-992.

Google Scholar: [Author Only](#) [Title Only](#) [Author and Title](#)

Katoh, K., and Standley, D.M. (2013). MAFFT multiple sequence alignment software version 7: improvements in performance and usability. *Mol Biol Evol* 30, 772-780.

Google Scholar: [Author Only](#) [Title Only](#) [Author and Title](#)

Katoh, K., Misawa, K., Kuma, K., and Miyata, T. (2002). MAFFT: a novel method for rapid multiple sequence alignment based on fast Fourier transform. *Nucleic Acids Res* 30, 3059-3066.

Google Scholar: [Author Only](#) [Title Only](#) [Author and Title](#)

Keller, T., Abbott, J., Moritz, T., and Doerner, P. (2006). Arabidopsis REGULATOR OF AXILLARY MERISTEMS1 controls a leaf axil stem cell niche and modulates vegetative development. *Plant Cell* 18, 598-611.

Google Scholar: [Author Only](#) [Title Only](#) [Author and Title](#)

Kim, S.J., Chandrasekar, B., Rea, A.C., Danhof, L., Zemelis-Durfee, S., Thrower, N., Shepard, Z.S., Pauly, M., Brandizzi, F., and Keegstra, K. (2020). The synthesis of xyloglucan, an abundant plant cell wall polysaccharide, requires CSLC function. *Proc Natl Acad Sci USA* 117, 20316-20324.

Google Scholar: [Author Only](#) [Title Only](#) [Author and Title](#)

Kong, Y.Z., Pena, M.J., Renna, L., Avci, U., Pattathil, S., Tuomivaara, S.T., Li, X.M., Reiter, W.D., Brandizzi, F., Hahn, M.G., Darvill, A.G., York, W.S., and O'Neill, M.A. (2015). Galactose-depleted xyloglucan is dysfunctional and leads to dwarfism in Arabidopsis. *Plant Physiol* 167, 1296-U1294.

Google Scholar: [Author Only](#) [Title Only](#) [Author and Title](#)

Landrein, B., Lathe, R., Bringmann, M., Vouillot, C., Ivakov, A., Boudaoud, A., Persson, S., and Hamant, O. (2013). Impaired cellulose synthase guidance leads to stem torsion and twists phyllotactic patterns in Arabidopsis. *Curr Biol* 23, 895-900.

Google Scholar: [Author Only](#) [Title Only](#) [Author and Title](#)

Lesage, A., Bardet, M., and Emsley, L. (1999). Through-bond carbon-carbon connectivities in disordered solids by NMR. *J Am Chem Soc* 121, 10987-10993.

Google Scholar: [Author Only](#) [Title Only](#) [Author and Title](#)

Lesage, A., Auger, C., Caldarelli, S., and Emsley, L. (1997). Determination of through-bond carbon-carbon connectivities in solid-state NMR using the INADEQUATE experiment. *J Am Chem Soc* 119, 7867-7868.

Google Scholar: [Author Only](#) [Title Only](#) [Author and Title](#)

Li, F.W., Brouwer, P., Carretero-Paulet, L., Cheng, S., de Vries, J., Delaux, P.M., Eily, A., Koppers, N., Kuo, L.Y., Li, Z., Simenc, M., Small, I., Wafula, E., Angarita, S., Barker, M.S., Brautigam, A., dePamphilis, C., Gould, S., Hosmani, P.S., Huang, Y.M., Huettel, B., Kato, Y., Liu, X., Maere, S., McDowell, R., Mueller, L.A., Nierop, K.G.J., Rensing, S.A., Robison, T., Rothfels, C.J., Sigel, E.M., Song, Y., Timilsena, P.R., Van de Peer, Y., Wang, H., Wilhelmsson, P.K.I., Wolf, P.G., Xu, X., Der, J.P., Schlueppmann, H., Wong, G.K., and Pryer, K.M. (2018). Fern genomes elucidate land plant evolution and cyanobacterial symbioses. *Nat Plants* 4, 460-472.

Google Scholar: [Author Only](#) [Title Only](#) [Author and Title](#)

Li, W.B., Guan, Q.M., Wang, Z.Y., Wang, Y.D., and Zhu, J.H. (2013). A bi-functional xyloglucan galactosyltransferase is an indispensable salt stress tolerance determinant in Arabidopsis. *Mol Plant* 6, 1344-1354.

Google Scholar: [Author Only](#) [Title Only](#) [Author and Title](#)

Li, X.M., Cordero, I., Caplan, J., Molhoj, M., and Reiter, W.D. (2004). Molecular analysis of 10 coding regions from Arabidopsis that are homologous to the MUR3 xyloglucan galactosyltransferase. *Plant Physiol* 134, 940-950.

Google Scholar: [Author Only](#) [Title Only](#) [Author and Title](#)

Liepman, A.H., Wilkerson, C.G., and Keegstra, K. (2005). Expression of cellulose synthase-like (Csl) genes in insect cells reveals that CslA family members encode mannan synthases. *Proc Natl Acad Sci USA* 102, 2221-2226.

Google Scholar: [Author Only](#) [Title Only](#) [Author and Title](#)

Liepman, A.H., Nairn, C.J., Willats, W.G., Sorensen, I., Roberts, A.W., and Keegstra, K. (2007). Functional genomic analysis supports conservation of function among cellulose synthase-like a gene family members and suggests diverse roles of mannans in plants. *Plant Physiol* 143, 1881-1893.

Google Scholar: [Author Only](#) [Title Only](#) [Author and Title](#)

Liu, L., Paulitz, J., and Pauly, M. (2015). The presence of fucogalactoxyloglucan and its synthesis in rice indicates conserved functional importance in plants. *Plant Physiol* 168, 549-560.

Google Scholar: [Author Only](#) [Title Only](#) [Author and Title](#)

Lopez, M., Bizot, H., Chambat, G., Marais, M.F., Zykwiniska, A., Ralet, M.C., Driguez, H., and Buleon, A. (2010). Enthalpic studies of xyloglucan-cellulose interactions. *Biomacromolecules* 11, 1417-1428.

Google Scholar: [Author Only](#) [Title Only](#) [Author and Title](#)

Lyczakowski, J.J., Bourdon, M., Terrett, O.M., Helariutta, Y., Wightman, R., and Dupree, P. (2019). Structural imaging of native cryo-preserved secondary cell walls reveals the presence of microfibrils and their formation requires normal cellulose, lignin and xylan biosynthesis. *Front Plant Sci* 10, 1398.

Google Scholar: [Author Only](#) [Title Only](#) [Author and Title](#)

Lyczakowski, J.J., Wicher, K.B., Terrett, O.M., Faria-Blanc, N., Yu, X., Brown, D., Krogh, K., Dupree, P., and Busse-Wicher, M. (2017). Removal of glucuronic acid from xylan is a strategy to improve the conversion of plant biomass to sugars for bioenergy. *Biotechnol Biofuels* 10, 224.

Google Scholar: [Author Only](#) [Title Only](#) [Author and Title](#)

Macquet, A., Ralet, M.C., Loudet, O., Kronenberger, J., Mouille, G., Marion-Poll, A., and North, H.M. (2007). A naturally occurring mutation in an Arabidopsis accession affects a beta-D-galactosidase that increases the hydrophilic potential of rhamnogalacturonan I in seed mucilage. *Plant Cell* 19, 3990-4006.

Google Scholar: [Author Only](#) [Title Only](#) [Author and Title](#)

Madson, M., Dunand, C., Li, X.M., Verma, R., Vanzin, G.F., Calplan, J., Shoue, D.A., Carpita, N.C., and Reiter, W.D. (2003). The MUR3 gene of Arabidopsis encodes a xyloglucan galactosyltransferase that is evolutionarily related to animal exostosins. *Plant Cell* 15, 1662-1670.

Google Scholar: [Author Only](#) [Title Only](#) [Author and Title](#)

Martinez-Abad, A., Jimenez-Quero, A., Wohlert, J., and Vilaplana, F. (2020). Influence of the molecular motifs of mannan and xylan populations on their recalcitrance and organization in spruce softwoods. *Green Chem* 22, 3956-3970.

Google Scholar: [Author Only](#) [Title Only](#) [Author and Title](#)

Metz, G., Wu, X.L., and Smith, S.O. (1994). Ramped-amplitude cross-polarization in magic-angle-spinning NMR. *J Magn Reson Ser A* 110, 219-227.

Google Scholar: [Author Only](#) [Title Only](#) [Author and Title](#)

Mikkelsen, M.D., Harholt, J., Ulvskov, P., Johansen, I.E., Fangel, J.U., Doblin, M.S., Bacic, A., and Willats, W.G. (2014). Evidence for land plant cell wall biosynthetic mechanisms in charophyte green algae. *Ann Bot* 114, 1217-1236.

Google Scholar: [Author Only](#) [Title Only](#) [Author and Title](#)

Mikkelsen, M.D., Harholt, J., Westereng, B., Domozych, D., Fry, S.C., Johansen, I.E., Fangel, J.U., Lezyk, M., Feng, T., Nancke, L., Mikkelsen, J.D., Willats, W.G.T., and Ulvskov, P. (2021). Ancient origin of fucosylated xyloglucan in charophyte green algae. *Commun Biol* 4, 754.

Google Scholar: [Author Only](#) [Title Only](#) [Author and Title](#)

Mortimer, J.C., Miles, G.P., Brown, D.M., Zhang, Z., Segura, M.P., Weimar, T., Yu, X., Seffen, K.A., Stephens, E., Turner, S.R., and Dupree, P. (2010). Absence of branches from xylan in Arabidopsis gux mutants reveals potential for simplification of lignocellulosic biomass. *Proc Natl Acad Sci U S A* 107, 17409-17414.

Google Scholar: [Author Only](#) [Title Only](#) [Author and Title](#)

Nikolovski, N., Rubtsov, D., Segura, M.P., Miles, G.P., Stevens, T.J., Dunkley, T.P.J., Munro, S., Lilley, K.S., and Dupree, P. (2012). Putative Glycosyltransferases and Other Plant Golgi Apparatus Proteins Are Revealed by LOPIT Proteomics. *Plant Physiol* 160, 1037-1051.

Google Scholar: [Author Only](#) [Title Only](#) [Author and Title](#)

Nothnagel, A.L., and Nothnagel, E.A. (2007). Primary cell wall structure in the evolution of land plants. *J Integr Plant Biol* 49, 1271-1278.

Google Scholar: [Author Only](#) [Title Only](#) [Author and Title](#)

**Nyberg, N.T., Duus, J.O., and Sorensen, O.W. (2005).** Heteronuclear two-bond correlation: suppressing heteronuclear three-bond or higher NMR correlations while enhancing two-bond correlations even for vanishing  $2J_{CH}$ . *J Am Chem Soc* 127, 6154-6155.

Google Scholar: [Author Only](#) [Title Only](#) [Author and Title](#)

**Obayashi, T., Aoki, Y., Tadaka, S., Kagaya, Y., and Kinoshita, K. (2018).** ATTED-II in 2018: A Plant Coexpression Database Based on Investigation of the Statistical Property of the Mutual Rank Index. *Plant Cell Physiol* 59, 440.

Google Scholar: [Author Only](#) [Title Only](#) [Author and Title](#)

**Park, Y.B., and Cosgrove, D.J. (2015).** Xyloglucan and its interactions with other components of the growing cell wall. *Plant Cell Physiol* 56, 180-194.

Google Scholar: [Author Only](#) [Title Only](#) [Author and Title](#)

**Pauly, M., and Keegstra, K. (2016).** Biosynthesis of the plant cell wall matrix polysaccharide xyloglucan. *Annu Rev Plant Biol* 67, 235-259.

Google Scholar: [Author Only](#) [Title Only](#) [Author and Title](#)

**Pena, M.J., Kong, Y.Z., York, W.S., and O'Neill, M.A. (2012).** A galacturonic acid-containing xyloglucan is involved in *Arabidopsis* root hair tip growth. *Plant Cell* 24, 4511-4524.

Google Scholar: [Author Only](#) [Title Only](#) [Author and Title](#)

**Pena, M.J., Ryden, P., Madson, M., Smith, A.C., and Carpita, N.C. (2004).** The galactose residues of xyloglucan are essential to maintain mechanical strength of the primary cell walls in *Arabidopsis* during growth. *Plant Physiol* 134, 443-451.

Google Scholar: [Author Only](#) [Title Only](#) [Author and Title](#)

**Popper, Z.A., and Fry, S.C. (2003).** Primary cell wall composition of bryophytes and charophytes. *Ann Bot* 91, 1-12.

Google Scholar: [Author Only](#) [Title Only](#) [Author and Title](#)

**Price, M.N., Dehal, P.S., and Arkin, A.P. (2010).** FastTree 2—approximately maximum-likelihood trees for large alignments. *Plos One* 5.

Google Scholar: [Author Only](#) [Title Only](#) [Author and Title](#)

**Prime, T.A., Sherrier, D.J., Mahon, P., Packman, L.C., and Dupree, P. (2000).** A proteomic analysis of organelles from *Arabidopsis thaliana*. *Electrophoresis* 21, 3488-3499.

Google Scholar: [Author Only](#) [Title Only](#) [Author and Title](#)

**Proost, S., Van Bel, M., Vanechoutte, D., Van de Peer, Y., Inze, D., Mueller-Roeber, B., and Vandepoele, K. (2015).** PLAZA 3.0: an access point for plant comparative genomics. *Nucleic Acids Res* 43, D974-981.

Google Scholar: [Author Only](#) [Title Only](#) [Author and Title](#)

**Raymond, O., Gouzy, J., Just, J., Badouin, H., Verdenaud, M., Lemainque, A., Vergne, P., Moja, S., Choisne, N., Pont, C., Carrère, S., Caissard, J.C., Couloux, A., Cottret, L., Aury, J.M., Szécsi, J., Latrasse, D., Madoui, M.A., Francois, L., Fu, X., Yang, S.H., Dubois, A., Piola, F., Larrieu, A., Perez, M., Labadie, K., Perrier, L., Govetto, B., Labrousse, Y., Villand, P., Bardoux, C., Boltz, V., Lopez-Roques, C., Heitzler, P., Vernoux, T., Vandenbussche, M., Quesneville, H., Boualem, A., Bendahmane, A., Liu, C., Le Bris, M., Salse, J., Baudino, S., Benhamed, M., Wincker, P., and Bendahmane, M. (2018).** The *Rosa* genome provides new insights into the domestication of modern roses. *Nat Genet* 50, 772-777.

Google Scholar: [Author Only](#) [Title Only](#) [Author and Title](#)

**Reiter, W.D., Chapple, C., and Somerville, C.R. (1997).** Mutants of *Arabidopsis thaliana* with altered cell wall polysaccharide composition. *Plant J* 12, 335-345.

Google Scholar: [Author Only](#) [Title Only](#) [Author and Title](#)

**Robert, M., Waldhauer, J., Stritt, F., Yang, B., Pauly, M., and Voiniciuc, C. (2021).** Modular biosynthesis of plant hemicellulose and its impact on yeast cells. *Biotechnol Biofuels* 14, 140.

Google Scholar: [Author Only](#) [Title Only](#) [Author and Title](#)

**Rodríguez-Gacio, C., Iglesias-Fernández, R., Carbonero, P., and Matilla, A.J. (2012).** Softening-up mannan-rich cell walls. *J Exp Bot* 63, 3976-3988.

Google Scholar: [Author Only](#) [Title Only](#) [Author and Title](#)

**Scheller, H.V., and Ulvskov, P. (2010).** Hemicelluloses. *Annu Rev Plant Biol* 61, 263-289.

Google Scholar: [Author Only](#) [Title Only](#) [Author and Title](#)

**Schröder, R., Wegrzyn, T.F., Sharma, N.N., and Atkinson, R.G. (2006).** LeMAN4 endo- $\beta$ -mannanase from ripe tomato fruit can act as a mannan transglycosylase or hydrolase. *Planta* 224, 1091-1102.

Google Scholar: [Author Only](#) [Title Only](#) [Author and Title](#)

**Schröder, R., Nicolas, P., Vincent, S.J., Fischer, M., Reymond, S., and Redgwell, R.J. (2001).** Purification and characterisation of a galactoglucomannan from kiwifruit (*Actinidia deliciosa*). *Carbohydr Res* 331, 291-306.

Google Scholar: [Author Only](#) [Title Only](#) [Author and Title](#)



Schultink, A., Cheng, K., Park, Y.B., Cosgrove, D.J., and Pauly, M. (2013). The identification of two arabinosyltransferases from tomato reveals functional equivalency of xyloglucan side chain substituents. *Plant Physiol* 163, 86-94.

Google Scholar: [Author Only](#) [Title Only](#) [Author and Title](#)

Shirakawa, M., Yamatoya, K., and Nishinari, K. (1998). Tailoring of xyloglucan properties using an enzyme. *Food Hydrocoll* 12, 25-28.

Google Scholar: [Author Only](#) [Title Only](#) [Author and Title](#)

Sierro, N., Battey, J.N., Ouadi, S., Bakaher, N., Bovet, L., Willig, A., Goepfert, S., Peitsch, M.C., and Ivanov, N.V. (2014). The tobacco genome sequence and its comparison with those of tomato and potato. *Nat Commun* 5, 1-9.

Google Scholar: [Author Only](#) [Title Only](#) [Author and Title](#)

Simmons, T.J., Mortimer, J.C., Bernardinelli, O.D., Pöppler, A.C., Brown, S.P., Deazevedo, E.R., Dupree, R., and Dupree, P. (2016). Folding of xylan onto cellulose fibrils in plant cell walls revealed by solid-state NMR. *Nat Commun* 7, 13902.

Google Scholar: [Author Only](#) [Title Only](#) [Author and Title](#)

Sims, I.M., Craik, D.J., and Bacic, A. (1997). Structural characterisation of galactoglucomannan secreted by suspension-cultured cells of *Nicotiana plumbaginifolia*. *Carbohydr Res* 303, 79-92.

Google Scholar: [Author Only](#) [Title Only](#) [Author and Title](#)

Somssich, M., Vandenbussche, F., Ivakov, A., Funke, N., Ruprecht, C., Vissenberg, K., Vander Straeten, D., Persson, S., and Suslov, D. (2021). Brassinosteroids influence arabidopsis hypocotyl graviresponses through changes in mannans and cellulose. *Plant Cell Physiol* 62, 678-692.

Google Scholar: [Author Only](#) [Title Only](#) [Author and Title](#)

Stamatakis, A. (2014). RAxML version 8: a tool for phylogenetic analysis and post-analysis of large phylogenies. *Bioinformatics* 30, 1312-1313.

Google Scholar: [Author Only](#) [Title Only](#) [Author and Title](#)

Tamura, K., Shimada, T., Kondo, M., Nishimura, M., and Hara-Nishimura, I. (2005). KATAMARI1/MURUS3 is a novel Golgi membrane protein that is required for endomembrane organization in Arabidopsis. *Plant Cell* 17, 1764-1776.

Google Scholar: [Author Only](#) [Title Only](#) [Author and Title](#)

Tedman-Jones, J.D., Lei, R., Jay, F., Fabro, G., Li, X., Reiter, W.D., Brearley, C., and Jones, J.D. (2008). Characterization of Arabidopsis mur3 mutations that result in constitutive activation of defence in petioles, but not leaves. *Plant J* 56, 691-703.

Google Scholar: [Author Only](#) [Title Only](#) [Author and Title](#)

Terrett, O.M., Lyczakowski, J.J., Yu, L., Iuga, D., Franks, W.T., Brown, S.P., Dupree, R., and Dupree, P. (2019). Molecular architecture of softwood revealed by solid-state NMR. *Nat Commun* 10, 4978.

Google Scholar: [Author Only](#) [Title Only](#) [Author and Title](#)

Thomas, J., Idris, N.A., and Collings, D.A. (2017). Pontamine fast scarlet 4B bifluorescence and measurements of cellulose microfibril angles. *J Microsc* 268, 13-27.

Google Scholar: [Author Only](#) [Title Only](#) [Author and Title](#)

Tryfona, T., Liang, H.C., Kotake, T., Tsumuraya, Y., Stephens, E., and Dupree, P. (2012). Structural characterization of arabidopsis leaf arabinogalactan polysaccharides. *Plant Physiol* 160, 653-666.

Google Scholar: [Author Only](#) [Title Only](#) [Author and Title](#)

Van Bel, M., Diels, T., Vancaester, E., Kreft, L., Botzki, A., Van de Peer, Y., Coppens, F., and Vandepoele, K. (2018). PLAZA4.0: an integrative resource for functional, evolutionary and comparative plant genomics. *Nucleic Acids Res* 46, D1190-D1196.

Google Scholar: [Author Only](#) [Title Only](#) [Author and Title](#)

Velasquez, S.M., Guo, X., Gallemi, M., Aryal, B., Venhuizen, P., Barbez, E., Dunser, K.A., Darino, M., Pěňčík, A., Novák, O., Kalyna, M., Mouille, G., Benkova, E., R, P.B., Mravec, J., and Kleine-Vehn, J. (2021). Xyloglucan remodeling defines auxin-dependent differential tissue expansion in plants. *Int J Mol Sci* 22.

Google Scholar: [Author Only](#) [Title Only](#) [Author and Title](#)

Voiniciuc, C., Dama, M., Gawenda, N., Stritt, F., and Pauly, M. (2019). Mechanistic insights from plant heteromannan synthesis in yeast. *P Natl Acad Sci USA* 116, 522-527.

Google Scholar: [Author Only](#) [Title Only](#) [Author and Title](#)

Voiniciuc, C., Schmidt, M.H., Berger, A., Yang, B., Ebert, B., Scheller, H.V., North, H.M., Usadel, B., and Günl, M. (2015). MUCILAGE-RELATED10 produces galactoglucomannan that maintains pectin and cellulose architecture in arabidopsis seed mucilage. *Plant Physiol* 169, 403-420.

Google Scholar: [Author Only](#) [Title Only](#) [Author and Title](#)

von Freiesleben, P., Spodsborg, N., Blicher, T.H., Anderson, L., Jørgensen, H., Stålbrand, H., Meyer, A.S., and Krogh, K.B. (2016). An *Aspergillus nidulans* GH26 endo- $\beta$ -mannanase with a novel degradation pattern on highly substituted galactomannans. *Enzyme and microb technol* 83, 68-77.

Google Scholar: [Author Only](#) [Title Only](#) [Author and Title](#)

**Vranken, W.F., Boucher, W., Stevens, T.J., Fogh, R.H., Pajon, A., Llinas, M., Ulrich, E.L., Markley, J.L., Ionides, J., and Laue, E.D. (2005). The CCPN data model for NMR spectroscopy: development of a software pipeline. *Proteins: struct funct bioinform* 59, 687-696.**

Google Scholar: [Author Only](#) [Title Only](#) [Author and Title](#)

**Wang, S., Li, L., Li, H., Sahu, S.K., Wang, H., Xu, Y., Xian, W., Song, B., Liang, H., Cheng, S., Chang, Y., Song, Y., Cebi, Z., Wittek, S., Reder, T., Peterson, M., Yang, H., Wang, J., Melkonian, B., Van de Peer, Y., Xu, X., Wong, G.K., Melkonian, M., Liu, H., and Liu, X. (2020). Genomes of early-diverging streptophyte algae shed light on plant terrestrialization. *Nat Plants* 6, 95-106.**

Google Scholar: [Author Only](#) [Title Only](#) [Author and Title](#)

**Wei, Q.Q., Yang, Y., Li, H., Liu, Z.W., Fu, R., Feng, H.Q., and Li, C. (2021). The xyloglucan galactosylation modulates the cell wall stability of pollen tube. *Planta* 254.**

Google Scholar: [Author Only](#) [Title Only](#) [Author and Title](#)

**Weston, D.J., Turetsky, M.R., Johnson, M.G., Granath, G., Lindo, Z., Belyea, L.R., Rice, S.K., Hanson, D.T., Engelhardt, K.A., and Schmutz, J. (2018). The sphagnum project: enabling ecological and evolutionary insights through a genus-level sequencing project. *New Phytol* 217, 16-25.**

Google Scholar: [Author Only](#) [Title Only](#) [Author and Title](#)

**Whitney, S.E.C., Wilson, E., Webster, J., Bacic, A., Reid, J.S.G., and Gidley, M.J. (2006). Effects of structural variation in xyloglucan polymers on interactions with bacterial cellulose. *Am J Bot* 93, 1402-1414.**

Google Scholar: [Author Only](#) [Title Only](#) [Author and Title](#)

**Xiao, C., Zhang, T., Zheng, Y., Cosgrove, D.J., and Anderson, C.T. (2016). Xyloglucan deficiency disrupts microtubule stability and cellulose biosynthesis in arabidopsis, altering cell growth and morphogenesis. *Plant Physiol* 170, 234-249.**

Google Scholar: [Author Only](#) [Title Only](#) [Author and Title](#)

**Yin, Y., Huang, J., and Xu, Y. (2009). The cellulose synthase superfamily in fully sequenced plants and algae. *BMC Plant Biol* 9, 99.**

Google Scholar: [Author Only](#) [Title Only](#) [Author and Title](#)

**Yu, L., Lyczakowski, J.J., Pereira, C.S., Kotake, T., Yu, X.L., Li, A., Mogelsvang, S., Skaf, M.S., and Dupree, P. (2018). The patterned structure of galactoglucomannan suggests it may bind to cellulose in seed mucilage. *Plant Physiol* 178, 1011-1026.**

Google Scholar: [Author Only](#) [Title Only](#) [Author and Title](#)

**Yu, L., Shi, D., Li, J., Kong, Y., Yu, Y., Chai, G., Hu, R., Wang, J., Hahn, M.G., and Zhou, G. (2014). CELLULOSE SYNTHASE-LIKE A2, a glucomannan synthase, is involved in maintaining adherent mucilage structure in Arabidopsis seed. *Plant Physiol* 164, 1842-1856.**

Google Scholar: [Author Only](#) [Title Only](#) [Author and Title](#)

**Zhang, L.S., Chen, F., Zhang, X.T., Li, Z., Zhao, Y.Y., Lohaus, R., Chang, X.J., Dong, W., Ho, S.Y.W., Liu, X., Song, A.X., Chen, J.H., Guo, W.L., Wang, Z.J., Zhuang, Y.Y., Wang, H.F., Chen, X.Q., Hu, J., Liu, Y.H., Qin, Y., Wang, K., Dong, S.S., Liu, Y., Zhang, S.Z., Yu, X.X., Wu, Q., Wang, L.S., Yan, X.Q., Jiao, Y.N., Kong, H.Z., Zhou, X.F., Yu, C.W., Chen, Y.C., Li, F., Wang, J.H., Chen, W., Chen, X.L., Jia, Q.D., Zhang, C., Jiang, Y.F., Zhang, W.B., Liu, G.H., Fu, J.Y., Chen, F., Ma, H., Van de Peer, Y., and Tang, H.B. (2020). The water lily genome and the early evolution of flowering plants. *Nature* 577, 79-84.**

Google Scholar: [Author Only](#) [Title Only](#) [Author and Title](#)

**Zhang, X.Y., Rogowski, A., Zhao, L., Hahn, M.G., Avci, U., Knox, J.P., and Gilbert, H.J. (2014). Understanding how the complex molecular architecture of mannan-degrading hydrolases contributes to plant cell wall degradation. *J Biol Chem* 289, 2002-2012.**

Google Scholar: [Author Only](#) [Title Only](#) [Author and Title](#)

**Zhang, Y., Yu, J.Y., Wang, X., Durachko, D.M., Zhang, S.L., and Cosgrove, D.J. (2021). Molecular insights into the complex mechanics of plant epidermal cell walls. *Science* 372, 706-711.**

Google Scholar: [Author Only](#) [Title Only](#) [Author and Title](#)

**Zhao, F., Chen, W., Sechet, J., Martin, M., Bovio, S., Lionnet, C., Long, Y., Battu, V., Mouille, G., Moneger, F., and Traas, J. (2019). Xyloglucans and microtubules synergistically maintain meristem geometry and phyllotaxis. *Plant Physiol* 181, 1191-1206.**

Google Scholar: [Author Only](#) [Title Only](#) [Author and Title](#)

**Zhao, Z., Crespi, V.H., Kubicki, J.D., Cosgrove, D.J., and Zhong, L. (2014). Molecular dynamics simulation study of xyloglucan adsorption on cellulose surfaces: effects of surface hydrophobicity and side-chain variation. *Cellulose* 21, 1025-1039.**

Google Scholar: [Author Only](#) [Title Only](#) [Author and Title](#)

**Zhu, L., Dama, M., and Pauly, M. (2018). Identification of an arabinopyranosyltransferase from *Physcomitrella patens* involved in the synthesis of the hemicellulose xyloglucan. *Plant Direct* 2, e00046.**

Google Scholar: [Author Only](#) [Title Only](#) [Author and Title](#)
